1 **Variable Effects on Growth and Defence Traits for Plant Ecotypic Differentiation and**  
2 **Phenotypic Plasticity along Elevation Gradients**

3

4

5 Moe Bakhtiari<sup>1†\*</sup>, Ludovico Formenti<sup>1†</sup>, Veronica Caggia<sup>1</sup>, Gaëtan Glauser<sup>2</sup>, Sergio  
6 Rasmann<sup>1</sup>

7

8 <sup>1</sup>Institute of Biology, University of Neuchâtel, rue Emile-Argand 11, 2000 Neuchâtel.

9 <sup>2</sup>Neuchâtel Platform of Analytical Chemistry, University of Neuchâtel, Avenue de Bellevaux  
10 51, CH-2000 Neuchâtel, Switzerland

11

12 \* Correspondence: Mojtaba.bakhtiari@unine.ch, Tel: 0041 32 718 23 37

13 † shared co-first authorship

14

15

16 Running head: plant ecotypic variation and phenotypic plasticity along elevation

17 **Abstract**

18 Along ecological gradients, ecotypes generally evolve as the result of local adaptation to a  
19 specific environment to maximize organisms' fitness. Alongside ecotypic differentiation,  
20 phenotypic plasticity, as the ability of a single genotype to produce different phenotypes  
21 under different environmental conditions, can also evolve for favouring increased organisms'  
22 performance in different environments. Currently, there is a lack in our understanding of how  
23 varying habitats may contribute to the differential contribution of ecotypic differentiation and  
24 plasticity in growth versus defence traits. Using reciprocal transplant-common gardens along  
25 steep elevation gradients, we evaluated patterns of ecotypic differentiation and phenotypic  
26 plasticity of two coexisting but unrelated plant species, *Cardamine pratensis* and *Plantago*  
27 *major*. For both species, we observed ecotypic differentiation accompanied by plasticity in  
28 growth related traits. Plants grew faster and produced more biomass when placed at low  
29 elevation. In contrast, we observed fixed ecotypic differentiation for defence and resistance  
30 traits. Generally, low elevation ecotypes produced higher chemical defences regardless of the  
31 growing elevation. Yet, some plasticity was observed for specific compounds, such as indole  
32 glucosinolates. We speculate that ecotypic differentiation in defence traits is maintained by  
33 costs of chemical defence production, while plasticity in growth traits is regulated by  
34 temperature driven growth response maximization.

35

36 **Key-words:** caffeoyl phenylethanoid glycoside, glucosinolates, iridoid glycosides, plant  
37 defence, plant-herbivore interaction.

## 38 Introduction

39 Species with extensive geographical ranges tend to exhibit large intraspecific variation in  
40 most functional and phenotypic traits. Such geographic variation can lead to the evolution of  
41 morphologically and functionally different genotypes or ecotypes (Hufford and Mazer, 2003;  
42 Kawecki and Ebert, 2004; Savolainen *et al.*, 2007). Ecotypes are comprised of genetically  
43 distinct population of a given species retaining traits that maximize fitness leading to local  
44 adaptation to particular local abiotic and biotic conditions (Kawecki and Ebert, 2004).  
45 Phenotypic variation within a species due to heritable ecotypic differentiation is further  
46 distinguished in different habitats by phenotypic plasticity. Phenotypic plasticity refers to the  
47 ability of a single genotype to produce different phenotypes under different environmental  
48 conditions. Plasticity itself can also be selected for and evolve differently for different  
49 developmental, physiological, and reproductive traits or in different habitats in order to  
50 optimize organisms' performance (Bradshaw, 1965; Gotthard *et al.*, 1995; Lortie and Aarssen,  
51 1996; Murren *et al.*, 2015; Scheiner, 1993; Sultan, 1987; Sultan, 2003). Species with greater  
52 adaptive plasticity respond more acutely to environmental changes, and may be better able to  
53 survive in novel environments allowing their rapid geographical spread inhabiting a broad  
54 range of environmental conditions (Baker, 1974; Oliva *et al.*, 1993; Spencer *et al.*, 1994), thus  
55 promoting local adaptation (Baldwin, 1896; Ghalambor *et al.*, 2007; Price *et al.*, 2003).

56 As sessile organisms, plants should experience strong local adaptation to local climate that  
57 strongly affects plants' fitness. For instance, with temperature transitions across species'  
58 latitudinal ranges or altitudinal niches- spanning low to high elevations-, plants tend to evolve  
59 to produce smaller seeds, to have earlier phenology, slower growth rates, and display greater  
60 investment in clonal reproduction (e.g. Chapin and Chapin, 1981; Körner, 2003; Moles *et al.*,  
61 2007; Montague *et al.*, 2008; Pilon *et al.*, 2003). At the community level, the emergence of  
62 interspecific interaction clines out of biogeographical clines is also expected. Since the initial  
63 Dobzhansky's postulate of a potential correlation between biotic interaction strength and trait  
64 values for traits mediating such interactions (Dobzhansky, 1950), a large volume of literature  
65 has focused on plant-herbivore interaction (Bolser and Hay, 1996; Coley and Aide, 1991;  
66 Schemske *et al.*, 2009). More specifically, it is expected that increased herbivory pressure in  
67 the tropics should favour the evolution of more potent defences in plants (Coley and Barone,  
68 1996; Moles *et al.*, 2011; Pellissier *et al.*, 2014; Pennings *et al.*, 2001; Rasmann and Agrawal,  
69 2011; Siska *et al.*, 2002; Woods *et al.*, 2011). Furthermore, a decrease in species diversity at  
70 high altitude can also be associated to a reduction in species interaction, and in turn, a

71 relaxation of plant defences across scales, such as at the community level (Callis-Duehl *et al.*,  
72 2017; Descombes *et al.*, 2016; Kergunteuil *et al.*, 2018), at the interspecific level (Defossez *et*  
73 *al.*, 2018; Pellissier *et al.*, 2012), as well as at the intraspecific level (Pellissier *et al.*, 2014;  
74 Scheidel and Bruelheide, 2004; Zehnder *et al.*, 2009). In analogy with latitudinal gradients,  
75 elevation gradients are emerging as optimal tools for studying plant trait variation along  
76 ecological clines that occur over short geographic distances (Körner, 2007). Indeed, plant  
77 adaptation to habitat-specific abiotic and biotic factors can be studied along elevation  
78 transects regardless of biogeographic history, gene-flow barriers, and within homogenous  
79 macroclimatic conditions (Rasmann *et al.*, 2014; Sundqvist *et al.*, 2013). Along  
80 environmental gradients, trait-mediated local adaptation of plant ecotypes is the result of  
81 selection for fitness maximization given the local biotic and abiotic conditions. Within  
82 genetically determined trait differences between ecotypes, variation emerges from phenotypic  
83 plasticity if plasticity for such trait expression does not come with relative costs to fitness  
84 (Gratani *et al.*, 2003; Van Tienderen, 1989).

85 Plant growth and defence related traits have been shown to vary in response to different  
86 conditions. For instance, high and low elevation *Plantago lanceolata* ecotypes growing at two  
87 temperature regimes (15 and 25 °C) showed strong plasticity in growth (i.e. both genotypes  
88 grew similarly within each environment), while their resistance to generalist herbivores  
89 reflected genetically-fixed patterns; high-elevation ecotypes were always less resistant,  
90 independently of the temperature regimes (Pellissier *et al.*, 2014). Such differences in  
91 plasticity would suggest that ecotypes that, at high elevation, produce lower amounts of  
92 constitutive defences were favoured by selection, and growing in warmer temperatures could  
93 not modulate this pattern of defence production. Similar reciprocal transplant experiments  
94 have been classically used to measure the extent of ecotypic differentiation and phenotypic  
95 plasticity (Nahum *et al.*, 2008). The predictions being that ecotypes adapted to one  
96 environment should change their phenotypes when place in a novel environment given their  
97 genetic constraints. Coupling reciprocal transplant with common garden experiments is  
98 critical because phenotypic plasticity of growth and defence traits in response to growing  
99 conditions can also generate clines, and such plasticity can obscure genetically based trait  
100 expression.

101 With this study, we aimed at measuring the magnitude of ecotypic differentiation and  
102 plasticity in growth and defence traits of two unrelated plant species with similar  
103 geographical distribution along elevation gradients in the Alps (Supplementary Fig. S1).

104 Specifically, we collected seeds of four populations of *Cardamine pratensis* (Brassicaceae)  
105 and six populations of *Plantago major* (Plantaginaceae); half of the populations were native  
106 to low elevation and the other half to high elevation. We grew high and low elevation  
107 ecotypes at both their native or non-native elevation range using two common gardens along  
108 a mountain transect, and we assessed variation in growth and defence (secondary metabolite)  
109 related traits. Based on the theoretical framework as shown in Fig. 1 (Leggett *et al.*, 2014;  
110 Schlichting and Pigliucci, 1998), we expected five contrasting scenarios: 1) to observe no  
111 ecotypic variation or plasticity when the traits remain constant across ecotypes and  
112 environments (Fig. 1A). 2) To observe ecotypic differentiation (ecotype effect only) with no  
113 plasticity when trait variation remains constant across elevations for a given ecotype but  
114 different ecotypes would exhibit different trait values (Fig. 1B). 3) To detect plasticity  
115 without ecotypic differentiation (elevation effect only) when both ecotypes show trait  
116 variations across different growing elevation, without significant difference between ecotypes  
117 (Fig. 1C). 3) To observe ecotypic effect accompanied by plasticity if different ecotypes  
118 exhibit differential values both from one another and at different growing elevation (elevation  
119 and ecotype effects) (Fig. 1D). Finally, we would expect to observe plasticity through  
120 genotype by environment effect when the interaction of ecotype and elevation explains the  
121 traits value (elevation  $\times$  ecotype effect) (Fig. 1E). Overall, this study builds towards a better  
122 understanding of the ecological and evolutionary drivers of pathways mediating plant  
123 phenotypic variation in growth versus defence traits along ecological clines.

124

## 125 **Material and methods**

### 126 *Plant materials*

127 *Cardamine pratensis* is a rhizomatous perennial herb that grows in a variety of habitats  
128 including nutrient-rich meadows, pastures, and forests and is common throughout Europe and  
129 in Central and Eastern Asia (Hultén and Fries, 1986). *C. pratensis* populations cover a wide  
130 elevation range, from sea level to 1600 meters above sea level (Aeschimann *et al.*, 2004), and  
131 flowers from April to June. Flowers are self-incompatible, and plants generally produce  
132 clonal offspring as new rosettes, especially under moist conditions (Lövkqvist, 1956), and are  
133 considered hemicryptophyte (i.e. a long-lived geophyte with overwintering green leaves).  
134 *Cardamine pratensis* contain glucosinolates (GLS), which, when in contact with myrosinases,  
135 enzymes present in separate compartments of the cells, are degraded into glucose and

136 sulphate, along with various nitrile, isothiocyanate, and thiocyanate molecules that are toxic  
137 or deterrent to generalist insect herbivores and some pathogens (Giamoustaris and Mithen,  
138 1995; Hopkins *et al.*, 1998; Kliebenstein *et al.*, 2002; Lambrix *et al.*, 2001). GLS are often  
139 classified into three classes of compounds depending on their side-chain: aliphatic, indole and  
140 aromatic, several of which have been shown to be effective against generalist and, to some  
141 extent, against specialist herbivores (Daxenbichler *et al.*, 1991; Louda and Rodman, 1983;  
142 Montaut and Bleeker, 2011). GLS are known to vary quantitatively and qualitatively  
143 (Kliebenstein *et al.*, 2001; Mauricio, 1998). In addition, phenotypic plasticity in GLS  
144 production has been previously observed in wild brassicaceous species (Agrawal *et al.*,  
145 2002). For instance, GLS profiles of *Boechea stricta* were strongly plastic, both among  
146 habitats and within habitats, and patterns of GLS plasticity varied greatly among genotypes  
147 (Wagner and Mitchell-Olds, 2018).

148 *Plantago major* is an annual or facultative perennial rosette-forming herbaceous plant. Not  
149 being very competitive, *P. major* generally grows in ruderal areas especially along paths or  
150 roadsides and near gateways, where grass is short or absent (Warwick and Briggs, 1980).  
151 Native to Eurasia, *P. major* is a cosmopolitan species. It reproduces both sexually (self-  
152 compatible wind pollinated) and asexually through rosettes formation. Low genetic diversity  
153 within population of *P. major* has been shown to favour ecotypic and phenotypic  
154 differentiation (Halbritter *et al.*, 2015; Van Dijk *et al.*, 1988; Warwick and Briggs, 1980).  
155 *Plantago major* can cover a very wide elevation range: from the sea level to the alpine  
156 ecosystems all the way up to 3'000 meters above sea level (Ren *et al.*, 1999). *Plantago major*  
157 produces important amounts of secondary metabolites belonging to the class of  
158 cyclopentanoid monoterpenes called iridoids glycosides (IGs) and caffeoyl phenylethanoid  
159 glycoside (CPG) compounds (Pankoke *et al.*, 2013), which act as herbivore deterrents against  
160 generalist chewing insect (Fuchs and Bowers, 2004). IGs and CPG display a relatively high  
161 degree of variation in plant tissues depending on plant population, plant phenology and  
162 environmental factors (Barton, 2008; Bowers and Stamp, 1993; Darrow and Bowers,  
163 1999; Darrow and Deane Bowers, 1997; Miede-Steier *et al.*, 2015; Pellissier *et al.*,  
164 2014), and they have been shown to display phenotypic plasticity (Bowers and Stamp,  
165 1992; Halbritter *et al.*, 2015; Kuiper and Smid, 1985; Lotz and Blom, 1986).

166

167 *Experimental design*

168 *Cardamine pratensis* seeds were collected from four different natural populations: two low  
169 elevation and two high elevation populations along elevation gradients of Jura Mountains in  
170 Switzerland in 2016. *Plantago major* seeds were collected from six different natural  
171 populations along three elevation gradients in the Swiss Alps during summer 2016  
172 (Supplementary Table S1). Seeds were collected on randomly selected plants (*C. pratensis*,  
173 n= 6 plants /population; *P. major*, n= 10 plants / population) within a 100 m radius for each  
174 population. We here did not track the maternal genetic background as is classically done in  
175 selection experiment studies, because we were principally interested at ecotypic variation and  
176 not at genotypic variation. Therefore seeds within one population were pooled to obtain  
177 elevation-specific ecotypes. Seeds were germinated in Petri dishes lined with humid filter  
178 paper. One week after germination, 25 seedlings of *C. pratensis* per population (total of 100  
179 plants) and 24 seedlings of *P. major* per population (total of 144 plants) were transplanted  
180 independently into plastic potting pots (13 cm width × 10 cm height) filled with 500 ml of  
181 sieved soil (1 cm mesh size) mixed with sand in a 3:1 ratio. Plants were immediately  
182 transferred to a climate-controlled chamber and kept at 16h/22°C - 8h/16°C day-night, and  
183 50% relative humidity conditions for two weeks. Plants received nutrients twice a week until  
184 the beginning of reciprocal transplant experiment.

185 After two weeks of growth in the climate chamber, 25 *C. pratensis* plants per population and  
186 24 *P. major* plants per population were equally distributed in two common gardens placed  
187 along the same mountain slope: La Neuveville (N: 47°06'84.28", E: 7°10'43.9", elevation: 450  
188 m), and Chasseral (N: 47°07'03.36", E: 7°01'45", elevation: 1600 m). The plants were left  
189 growing for a period of two months during summer 2017.

190

#### 191 *Plant growth-related traits*

192 For both plant species, the aboveground plant parts were separated from roots at the end of the  
193 experiment, oven-dried at 40°C for 48h and weighted to determine their dry biomass.  
194 Furthermore, in *P. major* plants, two additional growth-related traits were measured. The  
195 chlorophyll content of the plant was measured as the average of three fully expanded leaves  
196 per plant using a SPAD-502Plus chlorophyll meter (Konica Minolta (China) Investment Ltd).  
197 Specific leaf area (SLA) was measured as the area (calculated using ImageJ software) of one  
198 fully expanded leaf per plant divided by their oven-dried (40°C for 48h) biomass ( $\text{mm}^2 \text{mg}^{-1}$   
199 DW). Higher SLA levels and chlorophyll content tend to positively correlate with potential

200 relative growth rate across species, photosynthetic rate, or leaf nitrogen (N) (Garnier and  
201 Laurent, 1994; Poorter and Garnier, 2007). In general, species in resource-rich environments  
202 tend, on average, to have a higher SLA than do those in resource-poor environments (Garnier  
203 and Laurent, 1994; Poorter and Garnier, 2007).

#### 204 *Chemical defences*

205 All leaves were harvested immediately at the end of the field experiment prior to removal of  
206 plants from the field sites, while leaf preparation for each species followed two different  
207 methods due to the different secondary metabolite extractions and analyses.

208 *Cardamine pratensis* leaves were immediately frozen in liquid nitrogen and stored at -80 °C;  
209 ground to powder using mortars and pestles in liquid nitrogen, and a 100 mg aliquot was  
210 weighed for GLS extraction. The extraction solvent (1.0 ml methanol: H<sub>2</sub>O: formic acid  
211 (70:29.5:0.5, v/v)) was added to the tubes along with 5 glass beads, shaken in a tissue lyser  
212 (Retsch GMBH, Haan, Germany) for 4 min at 30 Hz, and centrifuged at 12800 rpm for 3 min.  
213 The supernatant was diluted 20 times with 70% methanol and transferred to an HPLC vial.  
214 GLS identification and quantification was performed using an Acquity ultra-high pressure  
215 liquid chromatography (UHPLC) from Waters (Milford, MA) interfaced to a Synapt G2  
216 quadrupole time-of-flight mass spectrometry (QTOF) from Waters with electrospray  
217 ionization, using the method as described in (Glauser *et al.*, 2012).

218 *Plantago major* leaves were oven-dried at 40 °C for 48 h prior being ground to powder using  
219 stainless steel beads in the tissue lyser, a 10 mg aliquot was weighed and a 1.5 ml methanol  
220 were added to the tubes along with 5 glass beads. The tubes were shaken 4 min at 30 Hz and  
221 centrifuged at 14000 rpm for 3 min. The supernatants were diluted five times by adding 800  
222 µl of MilliQ water to 200 µl of pure extract. IGs and CPG were separated by UHPLC-QTOF  
223 using an Acquity BEH C18 column from Waters (50x2.1mm, 1.7 µm particle size) at a flow  
224 rate of 0.4 ml/min. The following gradient of water + formic acid 0.05% (phase A) and  
225 acetonitrile + formic acid 0.05% (phase B) was applied: 2-9 % B in 1.5 min, 9-50 % B in 3.5  
226 min, 50-100% B in 1.5 min, held at 100% B for 1.5 min, back to 2% B and held for 2.0 min.  
227 The column was maintained at 25 °C. The injection volume was 1 µl. Detection was achieved  
228 in negative electrospray using the deprotonated ions or the formate adducts as quantification  
229 ions. Quantification ions and retention time of the two standards were: aucubin m/z 391.124  
230 (formate adduct), retention time 1.17 min, and verbascoside m/z 623.198 (deprotonated ion),  
231 retention time 3.16 min. Absolute amounts of IGs and CPG were determined by external



232 calibration using five standard solutions of aucubin at 0.2, 0.5, 2, 5 and 10  $\mu\text{g}/\text{land}$   
233 verbascoside at 0.2, 0.5, 2, 5 and 20  $\mu\text{g}/\text{ml}$ . Concentrations were normalized to plant weight  
234 and expressed as  $\mu\text{g}/\text{mg}$ . Other IGs and CPG were putatively identified based on their  
235 retention time and chemical formula by comparing them to previous detection in *P. major* or  
236 in species of *Plantago* genus (Rønsted *et al.*, 2000) and database (Dictionary of Natural  
237 Products, CRC Press, USA, version 6.1. on DVD) containing information on known IGs and  
238 CPGs and quantified as aucubin or verbascoside equivalents. IGs named with the code IGs  
239 followed by numbers represent molecular formula corresponding to potential IGs for which  
240 several isomers exist in the literature and thus cannot be unequivocally annotated.

241

#### 242 *Herbivore bioassay*

243 To measure plant resistance against insect herbivores (resistance is defined as the effect of  
244 plant defence traits on herbivore performance (Karban and Baldwin, 1997)); we used a  
245 generalist herbivore, *Spodoptera littoralis* (Lepidoptera: Noctuidae; obtained from Syngenta,  
246 Stein AG, Switzerland). *Spodoptera littoralis* is known to feed on species belonging to more  
247 than 80 families of plants (Brown and Dewhurst, 1975), and is widely used for performing  
248 plant resistance bioassays. Newly hatched larvae were reared on corn-based artificial diet for  
249 7 days before the beginning of the bioassay. Immediately after removal of plants from the  
250 field, both plant species were placed in a climate-controlled chamber (24 / 18 °C, 16/8 hr,  
251 day/night regime, and 55 % R.h.) to homogenize the condition for herbivores feeding on both  
252 species during bioassay performance. For *C. pratensis*, one fully expanded new leaf from 12  
253 plant per ecotype and per population that were growing at the two elevation common gardens  
254 (n = 48) was cut and separately placed in a Petri dish on a filter paper moisten with one drop  
255 of distilled water. One 7-days old *S. littoralis* larva was added to each petri dish. For *P. major*  
256 instead, we performed a whole plant bioassay. We placed two 7-day old *S. littoralis* larvae on  
257 24 plant per ecotype population that were growing at the two elevation common gardens (n =  
258 96). Plants were covered with nylon nets to avoid escaping of caterpillars. After five days of  
259 herbivory for *C. pratensis* and three days for *P. major*, the insects were retrieved from  
260 individual Petri dishes and plants, respectively and their weights were measured and recorded.  
261 We consider the larval gain weight using the formula  $\ln(\text{final weight} -$   
262  $\text{initial weight})$ . For *P. major* the larval gain weight represent the average of the two  
263 caterpillar placed on each plant. Lower weight gains indicate that plants are more resistant  
264 (Humphrey *et al.*, 2018).

265

266 *Statistical Analyses*

267 All statistical analyses were performed within the R environment (R Development Core  
268 Team, 2017).

269 For chemical data, we calculated the sum of glucosinolate compounds (GLS total) for *C.*  
270 *pratensis* and the sum of iridoids glycosides (IGs total) and caffeoyl phenylethanoid  
271 glycoside (CPG total) for *P. major*, as well as a measure of chemical diversity for both plant  
272 species using the Shannon-Weaver diversity indices (Hill, 1973) with *diversity* function in  
273 the *vegan* package in R (Oksanen *et al.*, 2017).

274 To measure the interactive effect of transplant site and elevation of origin of the plant  
275 ecotypes on plant growth and defence traits, we used two-way ANOVAs by including  
276 transplant sites (high and low), ecotypes (high and low) and their interaction as fixed factors.  
277 We also included the term population nested within ecotypes in the model to assess  
278 variability across populations within a given elevation of origin. The response variables  
279 were; AG biomass, larval weight gain, total GLS, total indole, total aliphatic, and chemical  
280 diversity for *C. pratensis*, and AG biomass, chlorophyll content, SLA, larval weight gain,  
281 total chemistry, total IGs, total CPG and chemical diversity for *P. major*. All chemical traits  
282 were log-transformed prior analyses to meet normality and homoscedasticity assumptions. A  
283 significant effect of site of growth (i.e. elevation) would indicate a plastic response to  
284 different environmental conditions. A significant effect of ecotype would indicate  
285 differentiation in traits among populations belonging to different ecotypes. A significant  
286 effect of population would indicate differentiation in traits among populations. A significant  
287 elevation  $\times$  ecotype term would indicate ecotype-specific selection for plasticity for a given  
288 trait.

289 To address the multivariate nature of plant secondary compounds, we also ran a full-factorial  
290 model including the individual secondary metabolites abundance matrix as response variable  
291 and plant ecotype and elevation as factors using permutational analysis of variance  
292 (PERMANOVA) with the *adonis* function in the package *vegan* in R (Oksanen *et al.*, 2017).  
293 We also included plant biomass as covariate to control for potential direct effect of biomass  
294 on plant chemistry (Züst *et al.*, 2015). The Bray–Curtis metric was used to calculate a  
295 dissimilarity matrix of all compounds among samples for the PERMANOVA. We visualized  
296 ecotypic differentiation of the secondary metabolites using an NMDS ordination analysis of

297 the chemical compounds based on Bray Curtis distance (package *vegan* in R) (Oksanen *et*  
298 *al.*, 2017).

299 Finally, to visualize and calculate the magnitude of plasticity of the plant growth and defence  
300 related traits when plants were placed in their non-native habitat, we calculated effect sizes for  
301 all traits as the log-response-ratio LLR=  $\log\left(\frac{\text{non-native elevation}}{\text{native elevation}}\right)$  using the *effsize* function  
302 in the *effsize* package in R (Torchiano, 2017), and when significant, we reported them as  
303 standardized mean difference (SMD) values. The figure constructed based on effect size aims  
304 at representing the plastic response of traits, G×E effects, as well as the magnitude of  
305 responses. A 95% of confidence interval bar that deviates from zero shows a significant effect  
306 of treatment (positive or negative effect of non-native growing elevation) (Nakagawa and  
307 Cuthill, 2007), while a deviation of one of the interval bars from zero, but not the other,  
308 indicates G×E effects.

309

## 310 **Results**

### 311 *Plant growth related traits*

312 For both species, we observed phenotypic plasticity and ecotypic differentiation in  
313 aboveground (AG) biomass through significant effects of both ecotype and elevation (high or  
314 low elevation growing sites) (Fig. 2, 3, 4; Table 1). We observed that AG biomass of high  
315 elevation ecotypes increased by 49% (SMD = 1.17) for *C. pratensis* and by 45% (SMD =  
316 1.48) for *P. major* at the non-native elevation (low elevation site), while low elevation  
317 ecotypes' AG biomass decreased by 61% (SMD = - 0.96) for *C. pratensis* and by 51% (SMD  
318 = - 1.93) for *P. major* at the non-native elevation (high elevation site) (Fig. 2, 3, 4; Table 1).  
319 Furthermore, our results indicated that high elevation ecotypes produced 38.5 % and 12%  
320 more AG biomass than low elevation ecotypes in *C. pratensis* and *P. major*, respectively. In  
321 addition, in *P. major* leaf chlorophyll content and SLA showed plasticity through growing  
322 elevation effect, with the latter also showing marginal G×E effect. Specifically, we observed  
323 that chlorophyll content of high elevation ecotypes increased by 4.1% (SMD = 1.55) at the  
324 non-native site (low elevation site) and low elevation ecotypes had 3.4% (SMD = -1.36) less  
325 chlorophyll content at the non-native site (high elevation) (Fig. 2B, 4; Table 1). Moreover,  
326 SLA of low elevation ecotypes significantly increased by 6.6% (SMD = 0.96) at their non-  
327 native growing site (Fig. 2B, 4; Table 1).

## 328 *Plant chemical defences and resistance*

329 The GLS profiles of *C. pratensis* leaves consisted of six GLS compounds (two aliphatic, three  
330 indoles and one aromatic), and the secondary metabolites profile of the *P. major* leaves  
331 consisted of 13 IGs and 3 CPG compounds (Supplementary Fig. S2). In *C. pratensis*, we  
332 observed phenotypic plasticity in total indole GLS, specifically through significant ecotype by  
333 elevation interaction (G×E effect), where the total indole GLS concentration in high elevation  
334 ecotypes significantly increased at the low elevation site (non-native) by 28% (SMD = 0.77)  
335 (Fig. 2A, 3; Table 1). Moreover, we found ecotypic effect for *S. littoralis* larval weight gain;  
336 larvae on low elevation ecotypes grew 81% more compared to high elevation ecotypes. Low  
337 elevation ecotypes produced 37% more aliphatic GLS than high elevation ecotypes, and high  
338 elevation ecotypes showed 25% more chemical diversity than low elevation ecotypes (Fig. 3,  
339 Table 1). Furthermore, the PERMANOVA showed that the abundance and chemical diversity  
340 of GLS were globally affected by plant ecotypes (P= 0.001, Fig. 5A-B). In *P. major*, we also  
341 found ecotypic differentiation for *S. littoralis* larval weight gain; larvae on low elevation  
342 ecotypes grew 8% more than on high elevation ecotypes. Low elevation ecotypes produced  
343 17%, 17% and 22% more total chemistry; total IGs and total CPG than high elevation  
344 ecotypes, respectively (Fig. 4, Table 1). The PERMANOVA revealed plant ecotypic effect  
345 (P= 0.001) and growing elevation effect (P= 0.005) (Fig. 5C-D) in the abundance and  
346 diversity of secondary metabolites in *P. major*. Additionally, we found that abundance of the  
347 total chemistry and diversity of the compounds were significantly affected by the AG biomass  
348 of *P. major* (P= 0.0002).

349 Overall, we also found significant population-level effects in trait expression. For instance, we  
350 found a significant effect of plant population for *C. pratensis* total GLS and aliphatic GLS  
351 (Supplementary Fig. S3 and Table 1). In *P. major*, we observed significant effects of plant  
352 population on all the measured traits (marginal for SLA and chlorophyll content)  
353 (Supplementary Fig. S4 and Table 1).

354

## 355 **Discussion**

356 Using reciprocal transplant experiments of ecotypes growing at different elevation, we  
357 observed ecotypic differentiation accompanied by plasticity in growth related traits, while we  
358 mainly observed ecotypic differentiation for defence and resistance traits for both *P. major*

359 and *C. pratensis*. Below, we outline the potential causes for such divergence along elevation  
360 gradients.

361

### 362 *Plant biomass accumulation*

363 We found high levels of phenotypic plasticity in the observed AG production pattern.  
364 Plasticity can be visualized as a change in the slope of the reaction norm between the  
365 ancestral and derived population or species (Doughty, 1995; Gotthard *et al.*, 1995). In this  
366 regard, for both species plant growth related traits (plant biomass, leaf chlorophyll content and  
367 SLA) showed plasticity. Our results compliment other findings where the combination of  
368 ecotypic differentiation and phenotypic plasticity in growth-related traits such as biomass and  
369 flower size was shown for invasive species at their invasive range (Martín-Forés *et al.*, 2017).  
370 More specifically, we observed that in both species, the AG biomass across both ecotypes  
371 increased at low elevation growing site and decreased at high elevation growing site. Increase  
372 in AG biomass of both ecotypes at low elevation growing site comes as no surprise, given the  
373 growing condition at low elevation are warmer and more favourable than at high elevation.  
374 Two reasons have been put forward for plants to reduce growth at high elevation. First, a  
375 decrease in the general metabolic activity as a function of colder temperature inhibits  
376 photosynthetic rate and biomass production (Boyer, 1982). Second, it has been proposed that  
377 because plants growing at higher elevations typically receive direct sunlight and higher  
378 ultraviolet radiation, and ultraviolet radiation destroys the auxins content at the apical shoots,  
379 they tend to grow much slower than lowland plants (Keller *et al.*, 2004). Furthermore, both *C.*  
380 *pratensis* and *P. major* are perennial species and it can be argued that high elevation ecotypes  
381 accumulated higher AG biomass than low elevation ecotypes once placed in more favourable  
382 conditions of low elevation to compensate for the next year's growing season when they  
383 would have to allocate more resource to flower and seed production. Such a scenario should  
384 be less likely for low elevation plants growing at their native site.

385 Interestingly, we also observed that high elevation ecotypes produced more biomass than low  
386 elevation ecotypes, and this was true for both species. This is somewhat surprising since we  
387 expected alpine plants to grow smaller in harsher and colder environments (Atkin and Day,  
388 1990; Körner, 2003). While plant size is negatively correlated to extremely cold temperatures  
389 (Squeo *et al.*, 1991) and, as a consequence, generally decreases with elevation (Körner, 2003),  
390 it appears that high-elevation ecotypes favour fast biomass accumulation (Körner, 2016).

391 Plants adapted to growing in cold conditions, such as in high altitude climates, where growing  
392 season is short, pass through seasonal development taking advantage of the warmest period of  
393 the growing season. In addition, plants growing at cold condition typically exhibit greater  
394 photosynthetic and respiratory capacities than their warm-grown counterparts (Atkin *et al.*,  
395 2006). Therefore, high-elevation ecotypes could highly benefit from faster development and  
396 high rates of metabolism (Körner, 2016), and, at equal growing conditions (same soil) and  
397 during the same growing period, can accumulate more biomass than their low-elevation  
398 counterparts.

399

#### 400 *Plant chemical defences and resistance*

401 Concerning plant defences and resistance, we observed ecotypic differentiation across most  
402 defence and resistance measures, including total GLS, aliphatic GLS, chemical diversity, total  
403 IGs, total CPG, total chemistry and larval weight. Generally, regardless of the growing  
404 elevation, low-elevation ecotypes produced more chemical defences. The strong effect of  
405 temperature on plant primary and secondary metabolism is known and our results are in line  
406 with other findings showing the temperature-driven suppression of plant secondary  
407 metabolites at high elevation (Pellissier *et al.*, 2014) and general decrease in secondary  
408 metabolite production from low to high elevation (Kergunteuil *et al.*, 2018). However, a  
409 decrease in secondary metabolite production at high elevation could also be attributed to a  
410 relaxation of herbivory pressure at high elevation (Pellissier *et al.*, 2014). To date we have no  
411 data that allows disentangling biotic and abiotic effects of defence decline at high elevation.  
412 Interestingly, however, indole GLS showed no ecotypic differentiation, in which, high  
413 elevation ecotypes produced more of these compounds when placed at low elevation (see G x  
414 E effect in Table 1).

415 Unlike aliphatic GLS, for which induction has been rarely observed (Koritsas *et al.*, 1991; Li  
416 *et al.*, 1999), induction of indolic GLS has been widely documented in several systems  
417 (Agrawal *et al.*, 1999; Doughty *et al.*, 1995; Griffiths *et al.*, 1994; Moyes *et al.*, 2000;  
418 Raybould and Moyes, 2001; Siemens and Mitchell-Olds, 1998), including the closely related  
419 *Cardamine hirsuta* (Bakhtiari *et al.*, unpublished data). Additionally, in contrast to the  
420 aliphatic GLS that are under strong genetic control (Raybould and Moyes, 2001), indole GLS  
421 have been shown to be strongly influenced by environmental factors with some heritable  
422 variation in production (Rücker and Röbbelen, 1994). Altogether, this could indicate that the

423 production of indole GLS might be more costly than the production of other GLS (Bidart-  
424 Bouzat *et al.*, 2005; Traw, 2002) in *C. pratensis*. Several studies detected a relatively high  
425 cost of plasticity for chemical defences and emphasized on the fact that the limit of plasticity  
426 in expression of chemical traits may be attributed to such cost (Agrawal *et al.*, 2002; Agrawal  
427 *et al.*, 2010; Züst and Agrawal, 2017). On the other hand, plasticity in defence-related traits is  
428 the reflection of both biotic and abiotic environmental conditions that affect the expression of  
429 defences, and plasticity of defence-related traits in response to biotic pressures, such as  
430 herbivory, is well-documented (Agrawal *et al.*, 2002; Humphrey *et al.*, 2018; Wagner and  
431 Mitchell-Olds, 2018). Such results may suggest that plants show higher degree of plastic  
432 response to biotic stimuli compared to abiotic stress such as environmental fluctuations. Thus,  
433 the lack of plasticity in the majority of the measured defence-related traits in our study could  
434 be due to the fact that the benefits of plasticity in expression of defence cannot outweigh the  
435 costs of biotic pressure occurred early in the season or other potential costs of defence  
436 plasticity. For example, indolic GLS were not plastic, in contrast to plastic non-indolic GLS,  
437 in *Cardamine cordifolia* plants growing in shaded-common gardens, that are characterized by  
438 low herbivory (Humphrey *et al.*, 2018). In contrast to our results, in the same study,  
439 Humphrey *et al.* found plasticity in larval weight gain of specialist herbivore (*Scaptomyza*  
440 *nigrita*).

441 On a broader perspective, detailed analysis of the effect sizes (ESs) between growth and  
442 defence related traits in *C. pratensis* indicates that the magnitude of plastic responses  
443 displayed by high elevation ecotypes is higher for AG biomass (very large ES) compared to  
444 indolic GLS production (large ES). In *P. major* the magnitude of plastic responses in all the  
445 growth-related traits were also very large, compared to the non-significant plastic responses  
446 for all the defence-related traits (except for some the individual compounds, Supplementary  
447 Fig. S2B). Nevertheless, the lack of plastic response to elevation in defence-related traits does  
448 not rule out the potential for plasticity in chemical defences. Given the fact that the  
449 environmental effect of the growing elevation could affect the plant chemistry at any time  
450 throughout the growing season and the chemistry was measured only at the end of the field  
451 season, a potential plasticity in expression of such traits could have disappeared by the end of  
452 the season. Moreover, detecting plastic response in defence traits upon biotic stress such as  
453 herbivory is simpler. Upon herbivory, the phytohormone activation machinery behind  
454 expression of chemical defences is an immediate process, whereas the detection of the  
455 potential plastic responsiveness of plant defence to abiotic stimuli might be masked by the

456 time-dependency of the growing season. For instance, phenotypic plasticity in flowering time  
457 in response to seasonal variations has been shown both in controlled environment (Anderson  
458 *et al.*, 2011) as well as from long-term field survey in *Boechera stricta* (Anderson *et al.*,  
459 2012). In addition, two studies, one on *C. cordifolia* and the second on *P. lanceolata*, showed  
460 phenological variation in GLS and IGs plant tissue content, respectively (Darrow and Deane  
461 Bowers, 1997; Rodman and Louda, 1984). Therefore, ontogeny should also be addressed  
462 when measuring plasticity because plants have been shown to express different levels of  
463 plasticity in defence traits as they grow.

464

## 465 **Conclusions**

466 Few studies have assessed phenotypic variation of plant growth versus defence traits in  
467 response to contrasting environments. Here, we document that plant growth traits displayed  
468 strong ecotypic differentiation accompanied by plasticity, but, in contrast, we find little  
469 support of phenotypically plastic defence and resistance traits in response to different growing  
470 habitat across step elevation gradient. Future research on similar systems would require  
471 coupling the observed effects on plant phenotypes with fitness measurements and selection  
472 gradient analyses in order to disentangle the fitness benefits of phenotypic plasticity versus  
473 fixed ecotypic differentiation for individual plant traits.

474

## 475 **Supplementary Data**

476 **Table S1.** Coordinates of the populations of *C. pratensis* and *P. major*.

477 **Fig. S1.** Natural distribution map of *C. pratensis* and *P. major* along elevation.

478 **Fig. S2.** Effect sizes of individual chemical compounds of *C. pratensis* and *P. major* growing  
479 at their non-native elevation.

480 **Fig. S3.** Reaction norms of growth and defense traits for populations of *C. pratensis*.

481 **Fig. S4.** Reaction norms of growth and defense traits for populations of *P. major*.

482

## 483 **Acknowledgments**

484 We thank Adrienne Godschalx for her valuable comments on the manuscript. This work was  
485 financed by a Swiss National Science Foundation grant 159869 to SR.



## References

- Aeschmann D, Lauber K, Moser DM, Theurillat J-P. 2004. *Flora alpina: ein Atlas sämtlicher 4500 Gefäßpflanzen der Alpen*.
- Agrawal AA, Conner JK, Johnson MTJ, Wallsgrove R. 2002. Ecological genetics of an induced plant defense against herbivores: Additive genetic variance and costs of phenotypic plasticity. *Evolution* **56**, 2206-2213.
- Agrawal AA, Conner JK, Rasmann S. 2010. Tradeoffs and negative correlations in evolutionary ecology. *Evolution since Darwin; the first 150 years*, Vol. 150. Stony Brook, NY: Sinauer Associates, 243-268.
- Agrawal AA, Strauss SY, Stout MJ. 1999. Costs of induced responses and tolerance to herbivory in male and female fitness components of wild radish. *Evolution* **53**, 1093-1104.
- Anderson JT, Inouye DW, McKinney AM, Colautti RI, Mitchell-Olds T. 2012. Phenotypic plasticity and adaptive evolution contribute to advancing flowering phenology in response to climate change. *Proceedings of the Royal Society B: Biological Sciences* **279**, 3843-3852.
- Anderson JT, Lee C-R, Mitchell-Olds T. 2011. Life history QTLs and natural selection on flowering time in *Boechera stricta*, a perennial relative of *Arabidopsis*. *Evolution; international journal of organic evolution* **65**, 771-787.
- Atkin O, Day D. 1990. A comparison of the respiratory processes and growth rate of selected austral alpine and related lowland plant species. *Functional Plant Biology* **17**, 517-526.
- Atkin OK, Loveys BR, Atkinson LJ, Pons TL. 2006. Phenotypic plasticity and growth temperature: understanding interspecific variability. *Journal of Experimental Botany* **57**, 267-281.
- Baker HG. 1974. The evolution of weeds. *Annual Review of Ecology and Systematics* **5**, 1-24.
- Baldwin JM. 1896. A new factor in evolution. *The American Naturalist* **30**, 441-451.
- Barton KE. 2008. Phenotypic plasticity in seedling defense strategies: compensatory growth and chemical induction. *Oikos* **117**, 917-925.
- Bidart-Bouzat MG, Mithen R, Berenbaum MR. 2005. Elevated CO<sub>2</sub> influences herbivory-induced defense responses of *Arabidopsis thaliana*. *Oecologia* **145**, 415-424.
- Bolser RC, Hay ME. 1996. Are tropical plants better defended? Palatability and defenses of temperate vs. tropical seaweeds. *Ecology* **77**, 2269-2286.
- Bowers MD, Stamp NE. 1992. Chemical variation within and between individuals of *Plantago lanceolata* (Plantaginaceae). *Journal of Chemical Ecology* **18**, 985-995.
- Bowers MD, Stamp NE. 1993. Effects of plant age, genotype and herbivory on *Plantago* performance and chemistry. *Ecology* **74**, 1778-1791.
- Boyer JS. 1982. Plant productivity and environment. *Science* **218**, 443-448.
- Bradshaw AD. 1965. Evolutionary significance of phenotypic plasticity in plants. In: Caspari EW, Thoday JM, eds. *Advances in Genetics*, Vol. 13: Academic Press, 115-155.
- Brown ES, Dewhurst CF. 1975. The genus spodoptera (Lepidoptera, Noctuidae) in Africa and the Near East. *Bulletin of Entomological Research* **65**, 221-262.
- Callis-Duehl K, Vittoz P, Defosse E, Rasmann S. 2017. Community-level relaxation of plant defenses against herbivores at high elevation. *Plant Ecology* **218**, 291-304.
- Chapin FS, Chapin MC. 1981. Ecotypic differentiation of growth processes in *Carex aquatilis* along latitudinal and local gradients. *Ecology* **62**, 1000-1009.
- Coley PD, Aide TM. 1991. Comparison of herbivory and plant defenses in temperate and tropical broad-leaved forests. In: Price PW, Lewinsohn TM, Fernandes GW, Benson WW, eds. *Plant-animal interactions: evolutionary ecology in tropical and temperate regions*. New York: Wiley, 25-49.
- Coley PD, Barone JA. 1996. Herbivory and plant defenses in tropical forests. *Annual Review of Ecology and Systematics* **27**, 305-335.
- Darrow K, Bowers MD. 1999. Effects of herbivore damage and nutrient level on induction of iridoid glycosides in *plantago lanceolata*. *Journal of Chemical Ecology* **25**, 1427-1440.

- Darrow K, Deane Bowers M.** 1997. Phenological and population variation in iridoid glycosides of *Plantago lanceolata* (Plantaginaceae). *Biochemical Systematics and Ecology* **25**, 1-11.
- Daxenbichler ME, Spencer GF, Carlson DG, Rose GB, Brinker AM, Powell RG.** 1991. Glucosinolate composition of seeds from 297 species of wild plants. *Phytochemistry* **30**, 2623-2638.
- Defossez E, Pellissier L, Rasmann S.** 2018. The unfolding of plant growth form-defence syndromes along elevation gradients. *Ecology Letters* **21**, 609-618.
- Descombes P, Marchon J, Pradervand J-N, Bilat J, Guisan A, Rasmann S, Pellissier L.** 2016. Community-level plant palatability increases with elevation as insect herbivore abundance declines. *Journal of Ecology* **105**, 142-151.
- Dobzhansky T.** 1950. Evolution in the tropics. *American Scientist* **38**, 209-221.
- Doughty KJ, Kiddle GA, Pye BJ, Wallsgrove RM, Pickett JA.** 1995. Selective induction of glucosinolates in oilseed rape leaves by methyl jasmonate. *Phytochemistry* **38**, 347-350.
- Doughty P.** 1995. Testing the ecological correlates of phenotypically plastic traits within a phylogenetic framework. *Acta Oecologica* **16**, 519-524.
- Fuchs A, Bowers MD.** 2004. Patterns of iridoid glycoside production and induction in *plantago lanceolata* and the importance of plant age. *Journal of Chemical Ecology* **30**, 1723-1741.
- Garnier E, Laurent G.** 1994. Leaf anatomy, specific mass and water content in congeneric annual and perennial grass species. *New Phytologist* **128**, 725-736.
- Ghalambor CK, McKay JK, Carroll SP, Reznick DN.** 2007. Adaptive versus non-adaptive phenotypic plasticity and the potential for contemporary adaptation in new environments. *Functional Ecology* **21**, 394-407.
- Giamoustaris A, Mithen R.** 1995. The effect of modifying the glucosinolate content of leaves of oilseed rape (*Brassica napus* ssp. *oleifera*) on its interaction with specialist and generalist pests. *Annals of Applied Biology* **126**, 347-363.
- Glauser G, Schweizer F, Turlings TC, Reymond P.** 2012. Rapid profiling of intact glucosinolates in *Arabidopsis* leaves by UHPLC-QTOFMS using a charged surface hybrid column. *Phytochem Anal* **23**, 520-528.
- Gotthard K, Nylin S, et al.** 1995. Adaptive plasticity and plasticity as an adaptation: A selective review of plasticity in animal morphology and life history. *Oikos* **74**, 3-17.
- Gratani L, Meneghini M, Pesoli P, Crescente MF.** 2003. Structural and functional plasticity of *Quercus ilex* seedlings of different provenances in Italy. *Trees* **17**, 515-521.
- Griffiths DW, Birch ANE, Macfarlane-Smith WH.** 1994. Induced changes in the indole glucosinolate content of oilseed and forage rape (*Brassica napus*) plants in response to either turnip root fly (*Delia floralis*) larval feeding or artificial root damage. *Journal of the Science of Food and Agriculture* **65**, 171-178.
- Halbritter AH, Billeter R, Edwards PJ, Alexander JM.** 2015. Local adaptation at range edges: comparing elevation and latitudinal gradients. *Journal of Evolutionary Biology* **28**, 1849-1860.
- Hill MO.** 1973. Diversity and evenness: A unifying notation and its consequences. *Ecology* **54**, 427-432.
- Hopkins RJ, Ekbohm B, Henkoff L.** 1998. Glucosinolate content and susceptibility for insect attack of three populations of *Sinapis alba*. *Journal of Chemical Ecology* **24**, 1203-1216.
- Hufford KM, Mazer SJ.** 2003. Plant ecotypes: genetic differentiation in the age of ecological restoration. *Trends in Ecology & Evolution* **18**, 147-155.
- Hultén E, Fries M.** 1986. *Atlas of North European vascular plants north of the tropic of cancer*. Koeltz Scientific.
- Humphrey PT, Gloss AD, Frazier J, Nelson-Dittrich AC, Faries S, Whiteman NK.** 2018. Heritable plant phenotypes track light and herbivory levels at fine spatial scales. *Oecologia* **187**, 427-445.
- Karban R, Baldwin IT.** 1997. *Induced responses to herbivory* / Richard Karban and Ian T. Baldwin: Chicago : The University of Chicago Press.
- Kawecki TJ, Ebert D.** 2004. Conceptual issues in local adaptation. *Ecology Letters* **7**, 1225-1241.
- Keller CP, Stahlberg R, Barkawi LS, Cohen JD.** 2004. Long-term inhibition by auxin of leaf blade expansion in bean and *Arabidopsis*. *Plant Physiology* **134**, 1217-1226.

- Kergunteuil A, Descombes P, Glauser G, Pellissier L, Rasmann S.** 2018. Plant physical and chemical defence variation along elevation gradients: a functional trait-based approach. *Oecologia* **187**, 561-571.
- Kliebenstein D, Pedersen D, Barker B, Mitchell-Olds T.** 2002. Comparative analysis of quantitative trait loci controlling glucosinolates, myrosinase and insect resistance in *Arabidopsis thaliana*. *Genetics* **161**, 325-332.
- Kliebenstein DJ, Kroymann J, Brown P, Figuth A, Pedersen D, Gershenzon J, Mitchell-Olds T.** 2001. Genetic control of natural variation in *Arabidopsis* glucosinolate accumulation. *Plant Physiology* **126**, 811-825.
- Koritsas V, Lewis J, Fenwick G.** 1991. Glucosinolate responses of oilseed rape, mustard and kale to mechanical wounding and infestation by cabbage stem flea beetle (*Psylliodes chrysocephala*). *Annals of Applied Biology* **118**, 209-221.
- Körner C.** 2003. *Alpine plant life: functional plant ecology of high mountain ecosystems*. Berlin: Springer.
- Körner C.** 2007. The use of 'altitude' in ecological research. *Trends in Ecology & Evolution* **22**, 569-574.
- Körner C.** 2016. Plant adaptation to cold climates. *F1000Research* **5**, F1000 Faculty Rev-2769.
- Kuiper D, Smid A.** 1985. Genetic differentiation and phenotypic plasticity in *Plantago major* ssp *major*. I. The effect of differences in level of irradiance on growth, photosynthesis, respiration and chlorophyll content. *Physiologia Plantarum* **65**, 520-528.
- Lambrix V, Reichelt M, Mitchell-Olds T, Kliebenstein DJ, Gershenzon J.** 2001. The *Arabidopsis* Epithiospecifier Protein Promotes the Hydrolysis of Glucosinolates to Nitriles and Influences *Trichoplusia ni* Herbivory. *Plant Cell* **13**, 2793-2808.
- Leggett HC, Brown SP, Reece SE.** 2014. War and peace: social interactions in infections. *Philosophical Transactions of the Royal Society B: Biological Sciences* **369**.
- Li Y, Kiddle G, Bennett R, Wallsgrave R.** 1999. Local and systemic changes in glucosinolates in Chinese and European cultivars of oilseed rape (*Brassica napus* L.) after inoculation with *Sclerotinia sclerotiorum* (stem rot). *Annals of Applied Biology* **134**, 45-58.
- Lortie CJ, Aarssen LW.** 1996. The specialization hypothesis for phenotypic plasticity in plants. *International Journal of Plant Sciences* **157**, 484-487.
- Lotz LAP, Blom CWPM.** 1986. Plasticity in life-history traits of *Plantago major* L. ssp. *pleiosperma* Pilger. *Oecologia* **69**, 25-30.
- Louda SM, Rodman JE.** 1983. Ecological patterns in the glucosinolate content of a native mustard, *Cardamine cordifolia*, in the rocky mountains. *Journal of Chemical Ecology* **9**, 397-422.
- Lövkvist B.** 1956. The *Cardamine pratensis* complex: outlines of its cytogenetics and taxonomy, Acta Universitatis Upsaliensis.
- Martín-Forés I, Avilés M, Acosta-Gallo B, Breed MF, del Pozo A, de Miguel JM, Sánchez-Jardón L, Castro I, Ovalle C, Casado MA.** 2017. Ecotypic differentiation and phenotypic plasticity combine to enhance the invasiveness of the most widespread daisy in Chile, *Leontodon saxatilis*. *Scientific Reports* **7**, 1546.
- Mauricio R.** 1998. Costs of resistance to natural enemies in field populations of the annual plant *Arabidopsis thaliana*. *The American Naturalist* **151**, 20-28.
- Miehe-Steier A, Roscher C, Reichelt M, Gershenzon J, Unsicker SB.** 2015. Light and nutrient dependent responses in secondary metabolites of *Plantago lanceolata* offspring are due to phenotypic plasticity in experimental grasslands. *PLoS One* **10**, e0136073.
- Moles AT, Ackerly DD, Tweddle JC, Dickie JB, Smith R, Leishman MR, Mayfield MM, Pitman A, Wood JT, Westoby M.** 2007. Global patterns in seed size. *Global Ecology and Biogeography* **16**, 109-116.
- Moles AT, Wallis IR, Foley WJ, Warton DI, Stegen JC, Bisigato AJ, Cella-Pizarro L, Clark CJ, Cohen PS, Cornwell WK, Edwards W, Ejrnaes R, Gonzales-Ojeda T, Graae BJ, Hay G, Lumbwe FC, Magana-Rodriguez B, Moore BD, Peri PL, Poulsen JR, Veldtman R, von Zeipel H, Andrew NR, Boulter SL, Borer ET, Campon FF, Coll M, Farji-Brener AG, De Gabriel J, Jurado E, Kyhn LA, Low B, Mulder CPH,**

- Reardon-Smith K, Rodriguez-Velazquez J, Seabloom EW, Vesik PA, van Cauter A, Waldram MS, Zheng Z, Blendinger PG, Enquist BJ, Facelli JM, Knight T, Majer JD, Martinez-Ramos M, McQuillan P, Prior LD.** 2011. Putting plant resistance traits on the map: a test of the idea that plants are better defended at lower latitudes. *New Phytologist* **191**, 777-788.
- Montague JL, Barrett SCH, Eckert CG.** 2008. Re-establishment of clinal variation in flowering time among introduced populations of purple loosestrife (*Lythrum salicaria*, Lythraceae). *J Evol Biol* **21**, 234-245.
- Montaut S, Bleeker RS.** 2011. *Cardamine* sp. – a review on its chemical and biological profiles. *Chemistry & Biodiversity* **8**, 955-975.
- Moyes CL, Collin HA, Britton G, Raybould AF.** 2000. Glucosinolates and differential herbivory in wild populations of *Brassica oleracea*. *Journal of Chemical Ecology* **26**, 2625-2641.
- Murren CJ, Auld JR, Callahan H, Ghalambor CK, Handelsman CA, Heskell MA, Kingsolver JG, Maclean HJ, Masel J, Maughan H, Pfennig DW, Relyea RA, Seiter S, Snell-Rood E, Steiner UK, Schlichting CD.** 2015. Constraints on the evolution of phenotypic plasticity: limits and costs of phenotype and plasticity. *Heredity* **115**, 293-301.
- Nahum S, Inbar M, Ne'eman G, Ben-Shlomo R.** 2008. Phenotypic plasticity and gene diversity in *Pistacia lentiscus* L. along environmental gradients in Israel. *Tree Genetics & Genomes* **4**, 777.
- Nakagawa S, Cuthill IC.** 2007. Effect size, confidence interval and statistical significance: a practical guide for biologists. *Biological Reviews* **82**, 591-605.
- Oksanen J, Blanchet FG, Friendly M, Kindt R, Legendre P, McGlinn D, Minchin PR, O'Hara RB, Simpson GL, Solymos P, Stevens MHH, Szoecs E, Wagner H.** 2017. *Vegan*: community ecology package.
- Oliva G, Martínez A, Collantes M, Dubcovsky J.** 1993. Phenotypic plasticity and contrasting habitat colonization in *Festuca pallescens*. *Canadian Journal of Botany* **71**, 970-977.
- Pankoke H, Buschmann T, Müller C.** 2013. Role of plant  $\beta$ -glucosidases in the dual defense system of iridoid glycosides and their hydrolyzing enzymes in *Plantago lanceolata* and *Plantago major*. *Phytochemistry* **94**, 99-107.
- Pellissier L, Fiedler K, Ndribe C, Dubuis A, Pradervand J-N, Guisan A, Rasmann S.** 2012. Shifts in species richness, herbivore specialization, and plant resistance along elevation gradients. *Ecology and Evolution* **2**, 1818-1825.
- Pellissier L, Roger A, Bilat J, Rasmann S.** 2014. High elevation *Plantago lanceolata* plants are less resistant to herbivory than their low elevation conspecifics: is it just temperature? *Ecography* **37**, 950-959.
- Pennings SC, Siska EL, Bertness MD.** 2001. Latitudinal differences in plant palatability in Atlantic coast salt marshes. *Ecology* **82**, 1344-1359.
- Pilon J, Santamaría L, Hootsmans M, van Vierssen W.** 2003. Latitudinal variation in life-cycle characteristics of *Potamogeton pectinatus* L.: vegetative growth and asexual reproduction. *Plant Ecology* **165**, 247-262.
- Poorter H, Garnier E.** 2007. Ecological significance of inherent variation in relative growth rate and its components. In: Pugnaire FI, Valladares F, eds. *Functional Plant Ecology*: Boca Raton: CRC Press, 67-100.
- Price TD, Qvarnström A, Irwin DE.** 2003. The role of phenotypic plasticity in driving genetic evolution. *Proceedings of the Royal Society B: Biological Sciences* **270**, 1433-1440.
- R Development Core Team.** 2017. *R: A language and environment for statistical computing*. Vienna, Austria: R Foundation for Statistical Computing.
- Rasmann S, Agrawal AA.** 2011. Latitudinal patterns in plant defense: evolution of cardenolides, their toxicity and induction following herbivory. *Ecology Letters* **14**, 476-483.
- Rasmann S, Pellissier L, Defosse E, Jactel H, Kunstler G.** 2014. Climate-driven change in plant-insect interactions along elevation gradients. *Functional Ecology* **28**, 46-54.
- Raybould A, Moyes C.** 2001. The ecological genetics of aliphatic glucosinolates. *Heredity* **87**, 383.
- Ren H-X, Wang Z-L, Chen X, Zhu Y-L.** 1999. Antioxidative responses to different altitudes in *Plantago major*. *Environmental and Experimental Botany* **42**, 51-59.

- Rodman JE, Louda SM.** 1984. Phenology of glucosinolate concentrations in roots, stems and leaves of *Cardamine cordifolia*. *Biochemical Systematics and Ecology* **12**, 37-46.
- Rønsted N, Göbel E, Franzyk H, Jensen SR, Olsen CE.** 2000. Chemotaxonomy of *Plantago*. Iridoid glucosides and caffeoyl phenylethanoid glycosides. *Phytochemistry* **55**, 337-348.
- Rücker B, Röbbelen G.** 1994. Inheritance of total and individual glucosinolate contents in seeds of winter oilseed rape (*Brassica napus* L.). *Plant Breeding* **113**, 206-216.
- Savolainen O, Pyhäjärvi T, Knürr T.** 2007. Gene flow and local adaptation in trees. *Annual Review of Ecology, Evolution, and Systematics* **38**, 595-619.
- Scheidel U, Bruelheide H.** 2004. The impact of altitude and simulated herbivory on the growth and carbohydrate storage of *Petasites albus*. *Plant Biology* **6**, 740-745.
- Scheiner SM.** 1993. Genetics and evolution of phenotypic plasticity. *Annual Review of Ecology and Systematics* **24**, 35-68.
- Schemske DW, Mittelbach GG, Cornell HV, Sobel JM, Roy K.** 2009. Is there a latitudinal gradient in the importance of biotic interactions? *Annual Review of Ecology Evolution and Systematics* **40**, 245-269.
- Schlichting CD, Pigliucci M.** 1998. *Phenotypic evolution: a reaction norm perspective*. Sunderland Sinauer Associates Incorporated.
- Siemens DH, Mitchell-Olds T.** 1998. Evolution of pest-induced defenses in *Brassica* plants: tests of theory. *Ecology* **79**, 632-646.
- Siska EL, Pennings SC, Buck TL, Hanisak MD.** 2002. Latitudinal variation in palatability of salt-marsh plants: Which traits are responsible? *Ecology* **83**, 3369-3381.
- Spencer WE, Teeri J, Wetzel RG.** 1994. Acclimation of photosynthetic phenotype to environmental heterogeneity. *Ecology* **75**, 301-314.
- Squeo FA, Rada F, Azocar A, Goldstein G.** 1991. Freezing tolerance and avoidance in high tropical Andean plants: Is it equally represented in species with different plant height? *Oecologia* **86**, 378-382.
- Sultan SE.** 1987. Evolutionary implications of phenotypic plasticity in plants. In: Hecht MK, Wallace B, Prance GT, eds. *Evolutionary Biology*, Vol. 21. Boston, MA: Springer US, 127-178.
- Sultan SE.** 2003. Phenotypic plasticity in plants: a case study in ecological development. *Evolution & Development* **5**, 25-33.
- Sundqvist MK, Sanders NJ, Wardle DA.** 2013. Community and ecosystem responses to elevational gradients: processes, mechanisms, and insights for global change. *Annual Review of Ecology, Evolution, and Systematics* **44**, 261-280.
- Torchiano M.** 2017. effsize: efficient effect size computation.
- Traw MB.** 2002. Is induction response negatively correlated with constitutive resistance in black mustard? *Evolution* **56**, 2196-2205.
- Van Dijk H, Wolff K, De Vries A.** 1988. Genetic variability in *Plantago* species in relation to their ecology. *Theoretical and Applied Genetics* **75**, 518-528.
- Van Tienderen P.** 1989. Measuring selection on quantitative characters: a discussion of some problems and merits of the quantitative genetic approach, applied to plant population. *Grassland Species Research Group publication*, 91-98.
- Wagner MR, Mitchell-Olds T.** 2018. Plasticity of plant defense and its evolutionary implications in wild populations of *Boechera stricta*. *Evolution* **72**, 1034-1049.
- Warwick SL, Briggs D.** 1980. The geneecology of lawn weeds. V. The adaptive significance of different growth habit in lawn and roadside populations of *Plantago major* L. *New Phytologist* **85**, 289-300.
- Woods EC, Hastings AP, Turley NE, Heard SB, Agrawal AA.** 2011. Adaptive geographical clines in the growth and defense of a native plant. *Ecological Monographs* **82**, 149-168.
- Zehnder CB, Stodola KW, Joyce BL, Egetter D, Cooper RJ, Hunter MD.** 2009. Elevational and seasonal variation in the foliar quality and arthropod community of *Acer pensylvanicum*. *Environmental Entomology* **38**, 1161-1167.
- Züst T, Agrawal AA.** 2017. Trade-offs between plant growth and defense against insect herbivory: An emerging mechanistic synthesis. *Annual Review of Plant Biology* **68**, 513-534.

**Züst T, Rasmann S, Agrawal AA.** 2015. Growth–defense tradeoffs for two major anti-herbivore traits of the common milkweed *Asclepias syriaca*. *Oikos* **124**, 1404-1415.

## Tables

**Table 1.** Two-way ANOVA Table for measuring the interaction between the effects of high and low elevation ecotypes and the elevation of growth in two common garden sites on growth and defence traits.

| Plant species       | Response variable  | Factor     | Df | Mean SQ | F value | P value   |
|---------------------|--------------------|------------|----|---------|---------|-----------|
| <i>C. pratensis</i> | AG biomass         | Ecotypes   | 1  | 2.15    | 14.59   | <0.001*** |
|                     |                    | Population | 2  | 0.09    | 0.64    | 0.53      |
|                     |                    | Elevation  | 1  | 5.22    | 35.41   | <0.001*** |
|                     |                    | Ecot *Elev | 1  | 0.02    | 0.14    | 0.7       |
|                     | Total GLS          | Ecotypes   | 1  | 0.16    | 0.17    | 0.7       |
|                     |                    | Population | 2  | 4.71    | 5       | 0.009**   |
|                     |                    | Elevation  | 1  | 0.38    | 0.40    | 0.5       |
|                     |                    | Ecot *Elev | 1  | 3.21    | 4       | 0.07      |
|                     | Total indole       | Ecotypes   | 1  | 0.6     | 0.38    | 0.5       |
|                     |                    | Population | 2  | 2.59    | 1.63    | 0.2       |
|                     |                    | Elevation  | 1  | 5.46    | 3.44    | 0.07      |
|                     |                    | Ecot *Elev | 1  | 11.45   | 7.22    | 0.009**   |
|                     | Total aliphatic    | Ecotypes   | 1  | 154.86  | 23.40   | <0.001*** |
|                     |                    | Population | 2  | 56.78   | 10.41   | <0.001*** |
|                     |                    | Elevation  | 1  | 1.52    | 0.28    | 0.6       |
|                     |                    | Ecot *Elev | 1  | 4.72    | 0.87    | 0.4       |
|                     | Chemical diversity | Ecotypes   | 1  | 4.69    | 12.33   | <0.001*** |
|                     |                    | Population | 2  | 0.72    | 1.89    | 0.2       |
|                     |                    | Elevation  | 1  | 0.59    | 1.55    | 0.22      |
|                     |                    | Ecot *Elev | 1  | 0.91    | 2.4     | 0.12      |

|                 |                     |            |   |        |        |                     |
|-----------------|---------------------|------------|---|--------|--------|---------------------|
|                 | Resistance          | Ecotypes   | 1 | 7.73   | 4.38   | <b>0.04*</b>        |
|                 |                     | Population | 2 | 0.06   | 0.04   | 1                   |
|                 |                     | Elevation  | 1 | 4.03   | 2.28   | 0.1                 |
|                 |                     | Ecot *Elev | 1 | 0.02   | 0.01   | 0.9                 |
| <i>P. major</i> | AG biomass          | Ecotypes   | 1 | 0.18   | 4.75   | <b>0.03*</b>        |
|                 |                     | Population | 4 | 0.1    | 2.47   | <b>0.047*</b>       |
|                 |                     | Elevation  | 1 | 4.63   | 118.88 | <b>&lt;0.001***</b> |
|                 |                     | Ecot *Elev | 1 | 0.004  | 0.09   | 0.8                 |
|                 | Chlorophyll content | Ecotypes   | 1 | 0.0008 | 0.1    | 0.8                 |
|                 |                     | Population | 4 | 0.02   | 2.28   | <b>0.06</b>         |
|                 |                     | Elevation  | 1 | 0.68   | 81.79  | <b>&lt;0.001***</b> |
|                 |                     | Ecot *Elev | 1 | 0.003  | 0.32   | 0.6                 |
|                 | SLA                 | Ecotypes   | 1 | 0.07   | 1.89   | 0.2                 |
|                 |                     | Population | 4 | 0.08   | 2.38   | <b>0.05</b>         |
|                 |                     | Elevation  | 1 | 0.81   | 23.14  | <b>&lt;0.001***</b> |
|                 |                     | Ecot *Elev | 1 | 0.1    | 2.78   | <b>0.09</b>         |
|                 | Total IGs           | Ecotypes   | 1 | 4.26   | 12.65  | <b>&lt;0.001***</b> |
|                 |                     | Population | 4 | 2.34   | 6.97   | <b>&lt;0.001***</b> |
|                 |                     | Elevation  | 1 | 0.7    | 2.07   | 0.2                 |
|                 |                     | Ecot *Elev | 1 | 0.04   | 0.1    | 0.7                 |
|                 | Total CPG           | Ecotypes   | 1 | 3.51   | 4.1    | <b>0.04*</b>        |
|                 |                     | Population | 4 | 2.14   | 2.49   | <b>0.04*</b>        |
|                 |                     | Elevation  | 1 | 0.09   | 0.11   | 0.7                 |
|                 |                     | Ecot *Elev | 1 | 1.1    | 1.28   | 0.3                 |
|                 | Total chemistry     | Ecotypes   | 1 | 6.2    | 14.78  | <b>&lt;0.001***</b> |



|  |                    |            |   |        |       |                     |
|--|--------------------|------------|---|--------|-------|---------------------|
|  |                    | Population | 4 | 1.4    | 3.33  | <b>0.01*</b>        |
|  |                    | Elevation  | 1 | 0.0.16 | 0.37  | 0.5                 |
|  |                    | Ecot *Elev | 1 | 0.08   | 0.18  | 0.7                 |
|  | Chemical diversity | Ecotypes   | 1 | 0.05   | 1.66  | 0.2                 |
|  |                    | Population | 4 | 0.09   | 3.11  | <b>0.02*</b>        |
|  |                    | Elevation  | 1 | 0.04   | 1.28  | 0.3                 |
|  |                    | Ecot *Elev | 1 | 0.02   | 0.76  | 0.4                 |
|  | Resistance         | Ecotypes   | 1 | 0.2    | 8.66  | <b>0.004**</b>      |
|  |                    | Population | 4 | 0.36   | 14.78 | <b>&lt;0.001***</b> |
|  |                    | Elevation  | 1 | 0.1    | 4.07  | <b>0.047*</b>       |
|  |                    | Ecot *Elev | 1 | 0.0003 | 0.01  | 0.9                 |

Signif. codes: 0 '\*\*\*' 0.001 '\*\*' 0.01 '\*' 0.05 '.' 0.1 ' ' 1

## Figure legends

**Fig. 1.** Theoretical framework for measuring ecotypic differentiation and phenotypic plasticity using reciprocal transplant experiments and reaction norms. The different panels represent all likely scenarios.

**Fig. 2.** Effect sizes for the influence of non-native growing elevation on plant growth and defence related trait for high and low elevation ecotypes of *C. pratensis* (A) and *P. major* (B). Effects are natural log response ratios (LRRs) with 95% confidence limits.

**Fig. 3.** Reaction norms of *C. pratensis* ecotypes of growth (A), resistance (B) and defence (C, D, E, F) traits. Mean phenotypic values (mean  $\pm$  1 s.e. for each elevation ecotype) are represented in black (low elevation ecotypes) and in grey (high elevation ecotypes) across two contrasted growing elevations (high or low elevation).

**Fig. 4.** Reaction norms of *P. major* ecotypes of growth (A, B, C), resistance (D) and defence (E, F, G, H) traits. Mean phenotypic values (mean  $\pm$  1 s.e. for each elevation ecotype) are represented in black (low elevation ecotypes) and in grey (high elevation ecotypes) across two contrasted growing elevations (high or low elevation).

**Fig. 5.** Glucosinolates (GLS), iridoid glycosides (IGs) and caffeoyl phenylethanoid glycoside (CPG) ordinations. Representation of the non-multidimensional scaling (NMDS) indicating the GLS found in high and low *C. pratensis* ecotypes at high (A) and low (B) elevation sites and IGs and CPG found in *P. major* ecotypes at high (C) and low (D) elevation sites. The 95% confidence interval ellipses are represented based on the two elevation ecotypes (high elevation ecotype in grey and low elevation ecotype in black). Stress values: (A) and (B) = 0.12, (C) and (D) = 0.2, K = 2.

## Figures

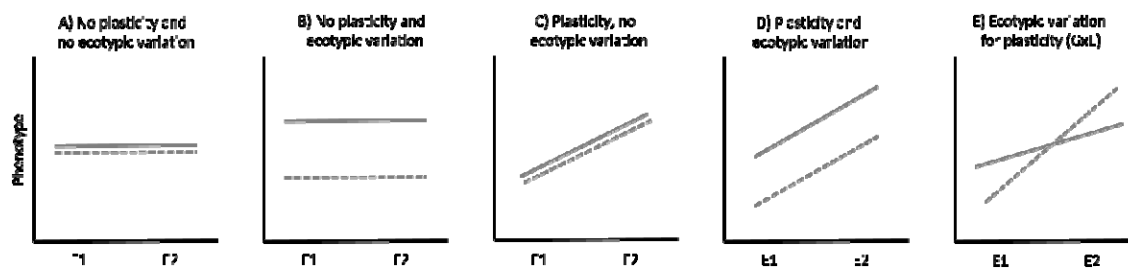

Fig. 1.

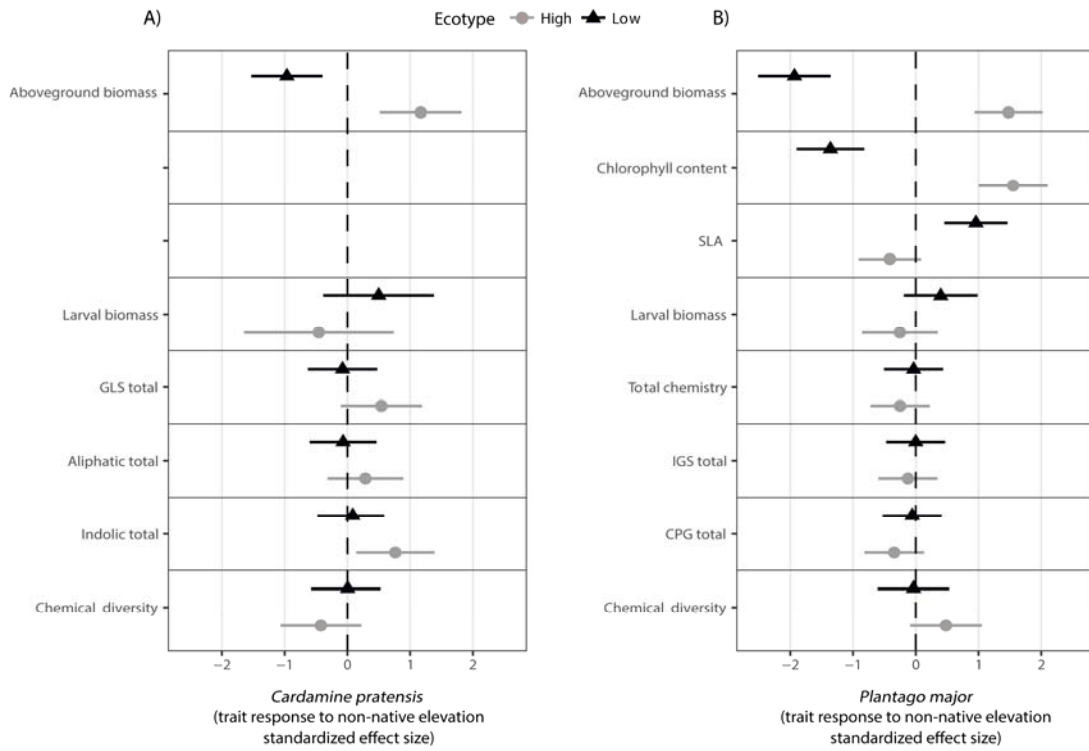

**Fig. 2.**

*Cardamine pratensis*

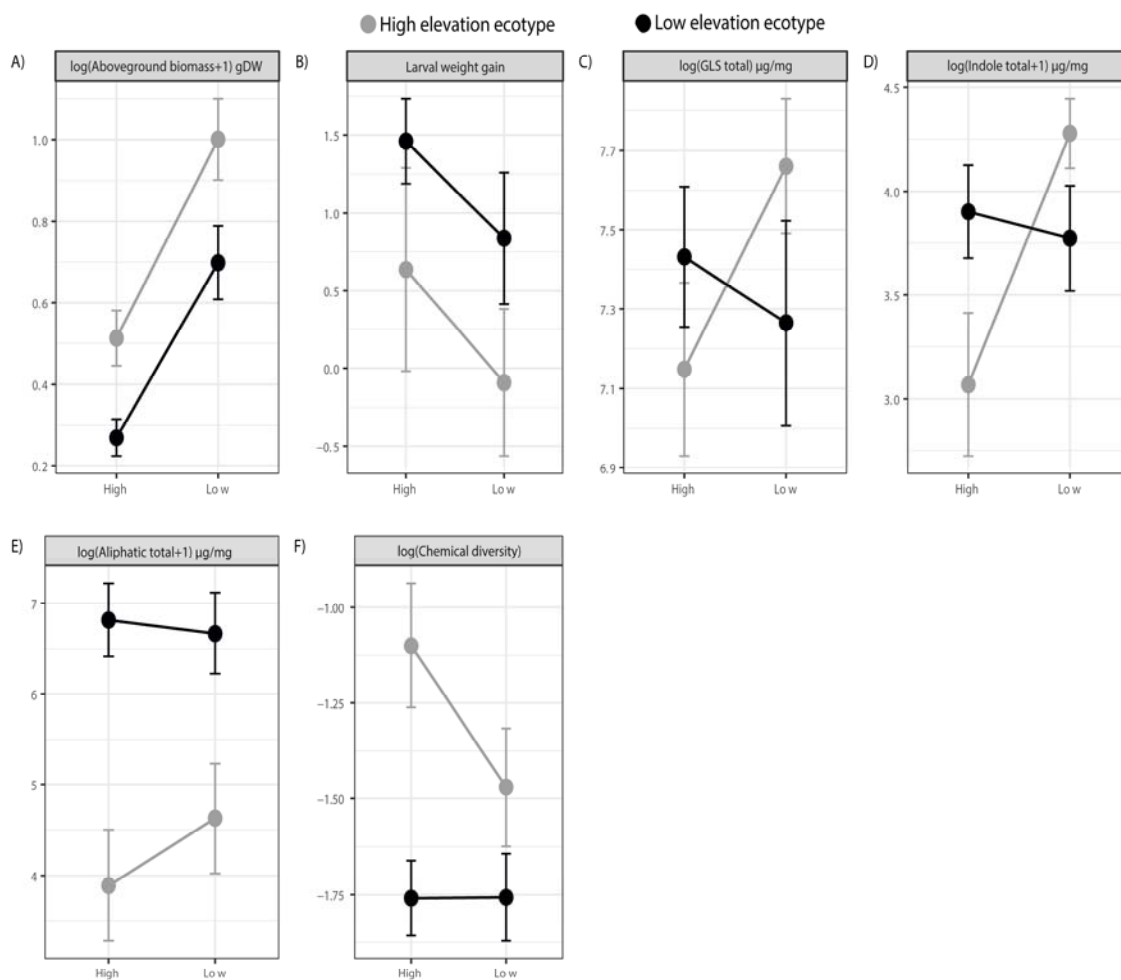

**Fig. 3.**

*Plantago major*

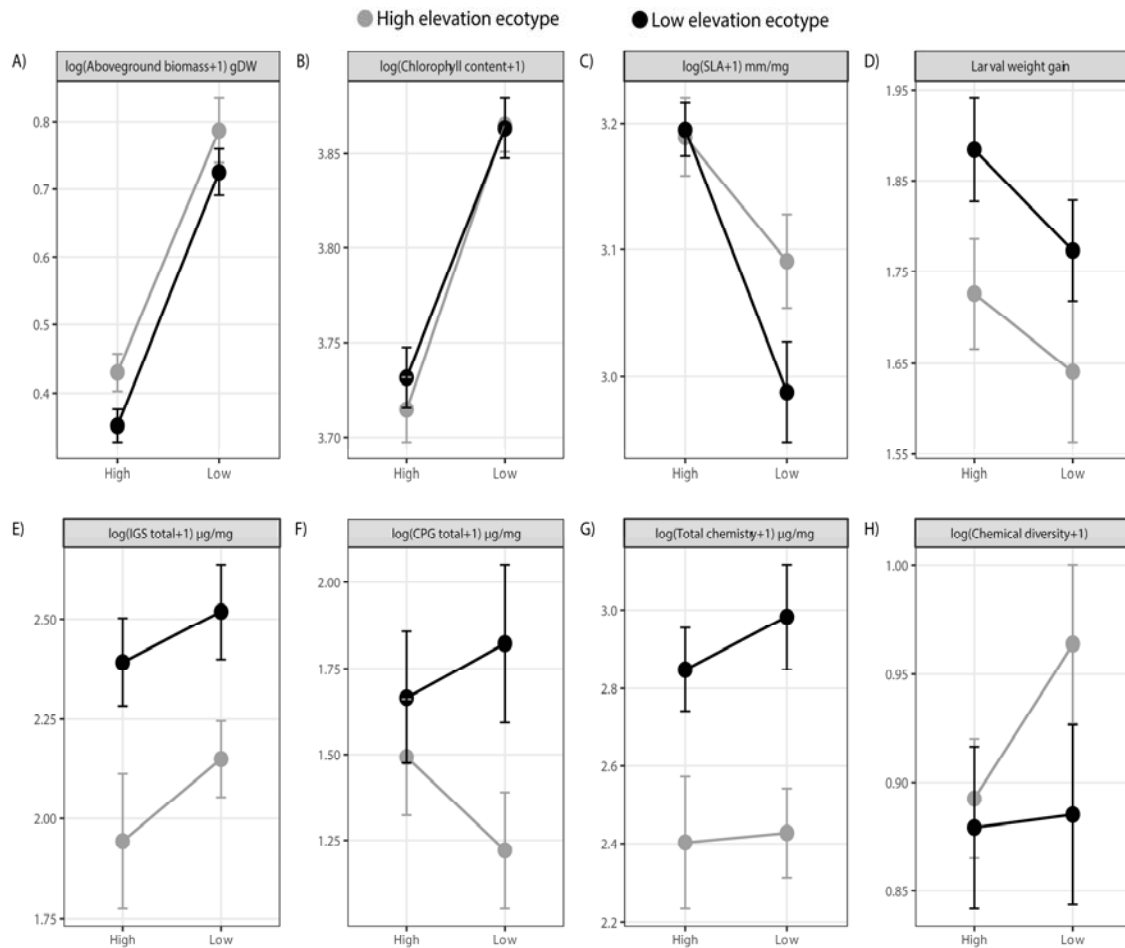

**Fig. 4.**

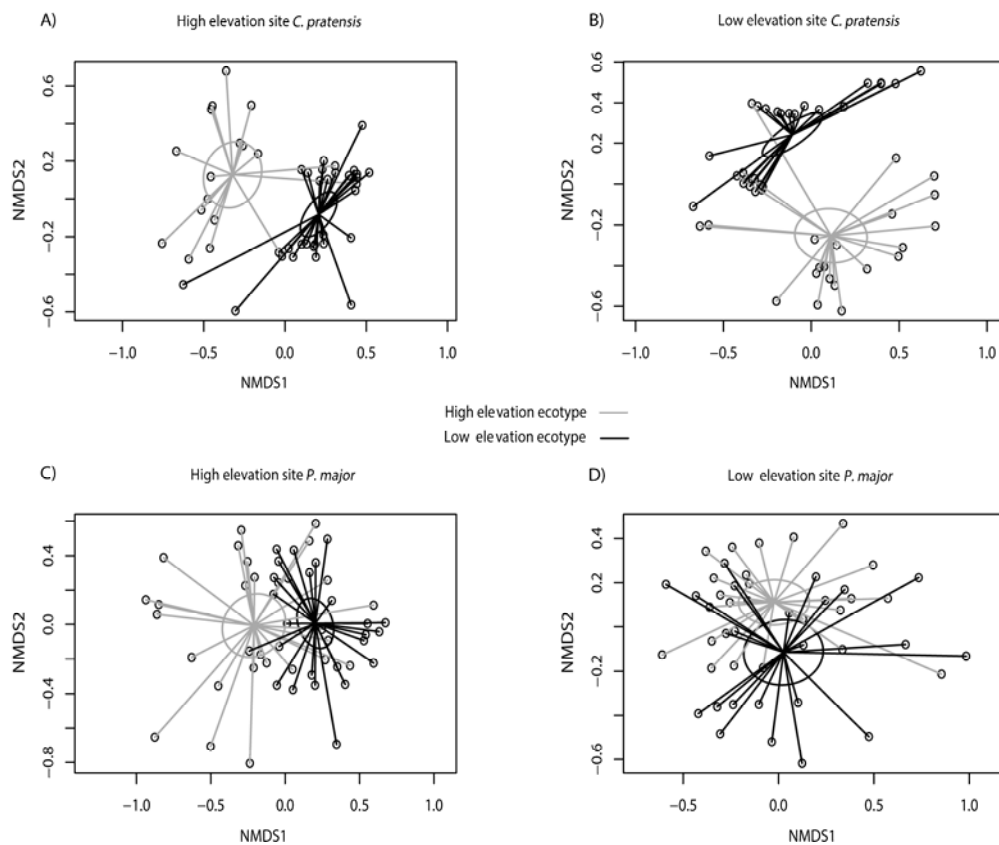

**Fig. 5.**

## Tables

**Table 1.** Two-way ANOVA Table for measuring the interaction between the effects of high and low elevation ecotypes and the elevation of growth in two common garden sites on growth and defence traits.

| Plant species       | Response variable | Factor     | Df     | Mean SQ | F value   | P value   |
|---------------------|-------------------|------------|--------|---------|-----------|-----------|
| <i>C. pratensis</i> | AG biomass        | Ecotypes   | 1      | 2.15    | 14.59     | <0.001*** |
|                     |                   | Population | 2      | 0.09    | 0.64      | 0.53      |
|                     |                   | Elevation  | 1      | 5.22    | 35.41     | <0.001*** |
|                     |                   | Ecot *Elev | 1      | 0.02    | 0.14      | 0.7       |
|                     | Total GLS         | Ecotypes   | 1      | 0.16    | 0.17      | 0.7       |
|                     |                   | Population | 2      | 4.71    | 5         | 0.009**   |
|                     |                   | Elevation  | 1      | 0.38    | 0.40      | 0.5       |
|                     |                   | Ecot *Elev | 1      | 3.21    | 4         | 0.07      |
|                     | Total indole      | Ecotypes   | 1      | 0.6     | 0.38      | 0.5       |
|                     |                   | Population | 2      | 2.59    | 1.63      | 0.2       |
|                     |                   | Elevation  | 1      | 5.46    | 3.44      | 0.07      |
|                     |                   | Ecot *Elev | 1      | 11.45   | 7.22      | 0.009**   |
| Total aliphatic     | Ecotypes          | 1          | 154.86 | 23.40   | <0.001*** |           |
|                     | Population        | 2          | 56.78  | 10.41   | <0.001*** |           |
|                     | Elevation         | 1          | 1.52   | 0.28    | 0.6       |           |
|                     | Ecot *Elev        | 1          | 4.72   | 0.87    | 0.4       |           |
| Chemical diversity  | Ecotypes          | 1          | 4.69   | 12.33   | <0.001*** |           |
|                     | Population        | 2          | 0.72   | 1.89    | 0.2       |           |
|                     | Elevation         | 1          | 0.59   | 1.55    | 0.22      |           |



|                 |                     |            |   |        |        |                     |
|-----------------|---------------------|------------|---|--------|--------|---------------------|
|                 |                     | Ecot *Elev | 1 | 0.91   | 2.4    | 0.12                |
|                 | Resistance          | Ecotypes   | 1 | 7.73   | 4.38   | <b>0.04*</b>        |
|                 |                     | Population | 2 | 0.06   | 0.04   | 1                   |
|                 |                     | Elevation  | 1 | 4.03   | 2.28   | 0.1                 |
|                 |                     | Ecot *Elev | 1 | 0.02   | 0.01   | 0.9                 |
| <i>P. major</i> | AG biomass          | Ecotypes   | 1 | 0.18   | 4.75   | <b>0.03*</b>        |
|                 |                     | Population | 4 | 0.1    | 2.47   | <b>0.047*</b>       |
|                 |                     | Elevation  | 1 | 4.63   | 118.88 | <b>&lt;0.001***</b> |
|                 |                     | Ecot *Elev | 1 | 0.004  | 0.09   | 0.8                 |
|                 | Chlorophyll content | Ecotypes   | 1 | 0.0008 | 0.1    | 0.8                 |
|                 |                     | Population | 4 | 0.02   | 2.28   | <b>0.06</b>         |
|                 |                     | Elevation  | 1 | 0.68   | 81.79  | <b>&lt;0.001***</b> |
|                 |                     | Ecot *Elev | 1 | 0.003  | 0.32   | 0.6                 |
|                 | SLA                 | Ecotypes   | 1 | 0.07   | 1.89   | 0.2                 |
|                 |                     | Population | 4 | 0.08   | 2.38   | <b>0.05</b>         |
|                 |                     | Elevation  | 1 | 0.81   | 23.14  | <b>&lt;0.001***</b> |
|                 |                     | Ecot *Elev | 1 | 0.1    | 2.78   | <b>0.09</b>         |
|                 | Total IGs           | Ecotypes   | 1 | 4.26   | 12.65  | <b>&lt;0.001***</b> |
|                 |                     | Population | 4 | 2.34   | 6.97   | <b>&lt;0.001***</b> |
|                 |                     | Elevation  | 1 | 0.7    | 2.07   | 0.2                 |
|                 |                     | Ecot *Elev | 1 | 0.04   | 0.1    | 0.7                 |
|                 | Total CPG           | Ecotypes   | 1 | 3.51   | 4.1    | <b>0.04*</b>        |
|                 |                     | Population | 4 | 2.14   | 2.49   | <b>0.04*</b>        |

|  |                    |            |   |        |       |                     |
|--|--------------------|------------|---|--------|-------|---------------------|
|  |                    | Elevation  | 1 | 0.09   | 0.11  | 0.7                 |
|  |                    | Ecot *Elev | 1 | 1.1    | 1.28  | 0.3                 |
|  | Total chemistry    | Ecotypes   | 1 | 6.2    | 14.78 | <b>&lt;0.001***</b> |
|  |                    | Population | 4 | 1.4    | 3.33  | <b>0.01*</b>        |
|  |                    | Elevation  | 1 | 0.0.16 | 0.37  | 0.5                 |
|  |                    | Ecot *Elev | 1 | 0.08   | 0.18  | 0.7                 |
|  | Chemical diversity | Ecotypes   | 1 | 0.05   | 1.66  | 0.2                 |
|  |                    | Population | 4 | 0.09   | 3.11  | <b>0.02*</b>        |
|  |                    | Elevation  | 1 | 0.04   | 1.28  | 0.3                 |
|  |                    | Ecot *Elev | 1 | 0.02   | 0.76  | 0.4                 |
|  | Resistance         | Ecotypes   | 1 | 0.2    | 8.66  | <b>0.004**</b>      |
|  |                    | Population | 4 | 0.36   | 14.78 | <b>&lt;0.001***</b> |
|  |                    | Elevation  | 1 | 0.1    | 4.07  | <b>0.047*</b>       |
|  |                    | Ecot *Elev | 1 | 0.0003 | 0.01  | 0.9                 |

Signif. codes: 0 '\*\*\*' 0.001 '\*\*' 0.01 '\*' 0.05 '.' 0.1 ' ' 1

## Figures

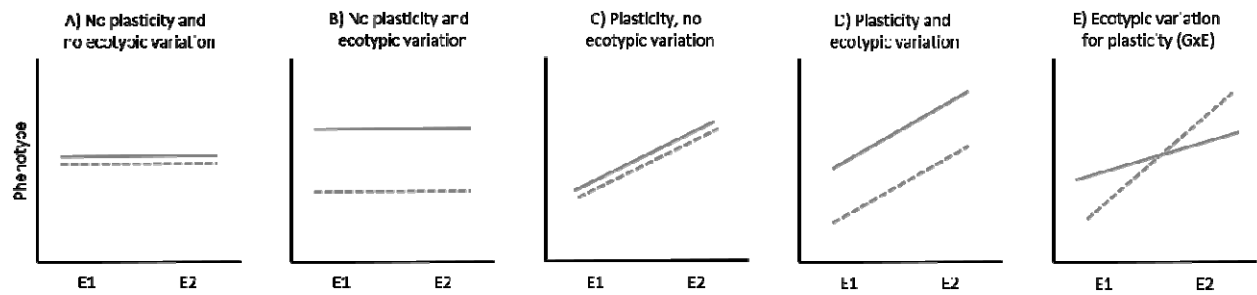

**Fig. 1.** Theoretical framework for measuring ecotypic differentiation and phenotypic plasticity using reciprocal transplant experiments and reaction norms. The different panels represent all likely scenarios.

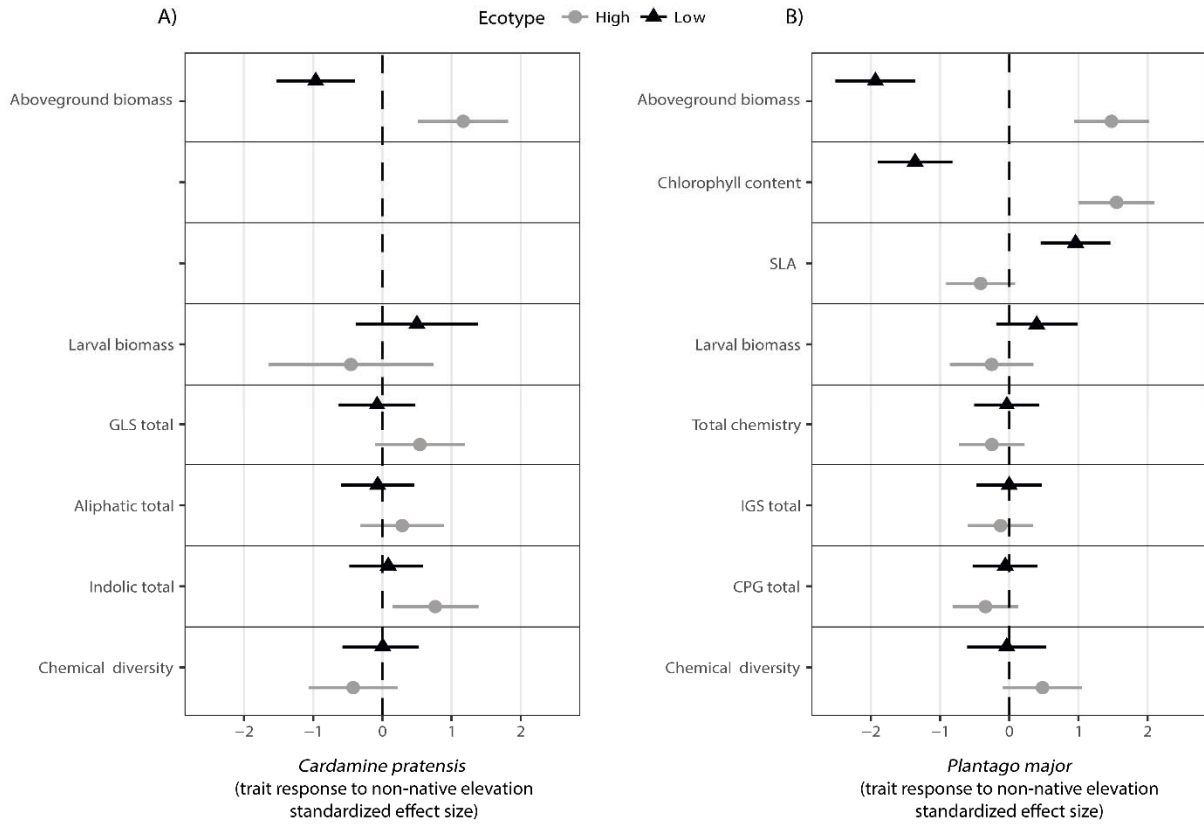

**Fig. 2.** Effect sizes for the influence of non-native growing elevation on plant growth and defence related trait for high and low elevation ecotypes of *C pratensis* (A) and *P. major* (B). Effects are natural log response ratios (LRRs) with 95% confidence limits.

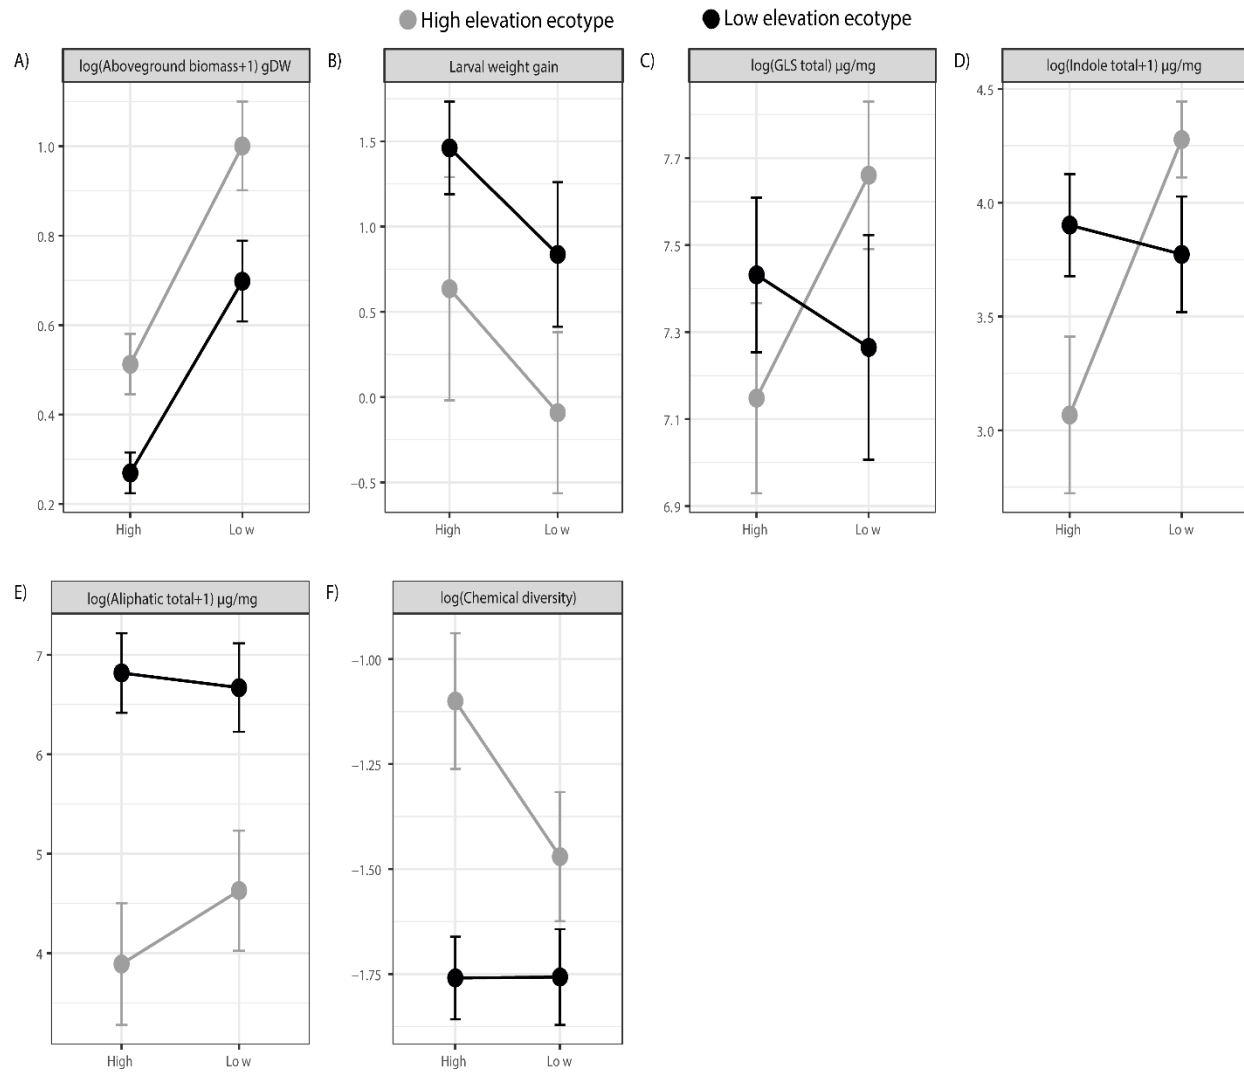

**Fig. 3.** Reaction norms of *C. pratensis* ecotypes of growth (A), resistance (B) and defence (C, D, E, F) traits. Mean phenotypic values (mean  $\pm$  1 s.e. for each elevation ecotype) are represented in black (low elevation ecotypes) and in grey (high elevation ecotypes) across two contrasted growing elevations (high or low elevation).

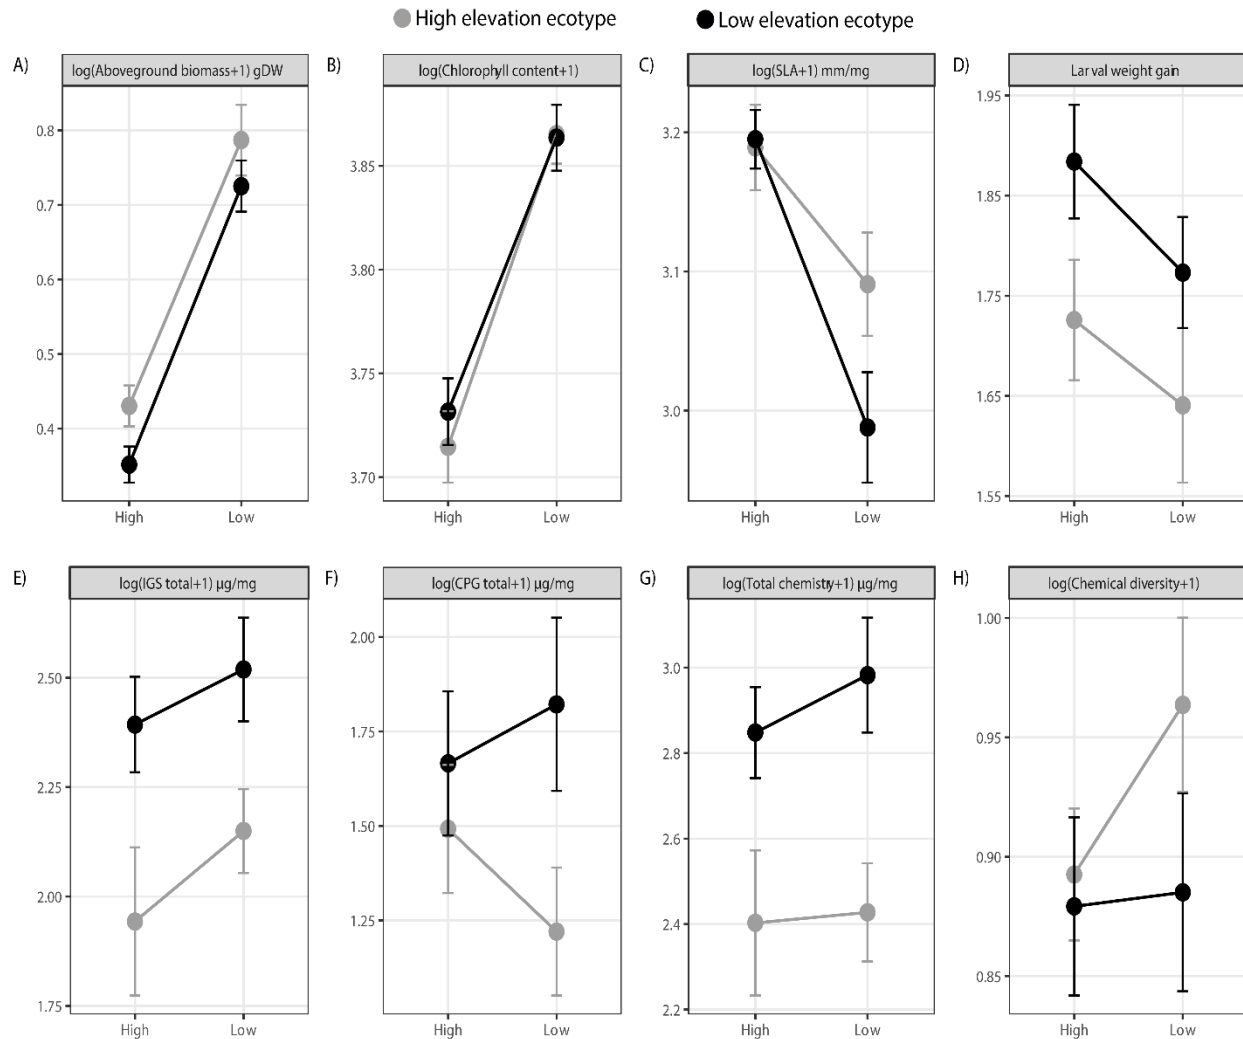

**Fig. 4.** Reaction norms of *P. major* ecotypes of growth (A, B, C), resistance (D) and defence (E, F, G, H) traits. Mean phenotypic values (mean  $\pm$  1 s.e. for each elevation ecotype) are represented in black (low elevation ecotypes) and in grey (high elevation ecotypes) across two contrasted growing elevations (high or low elevation).

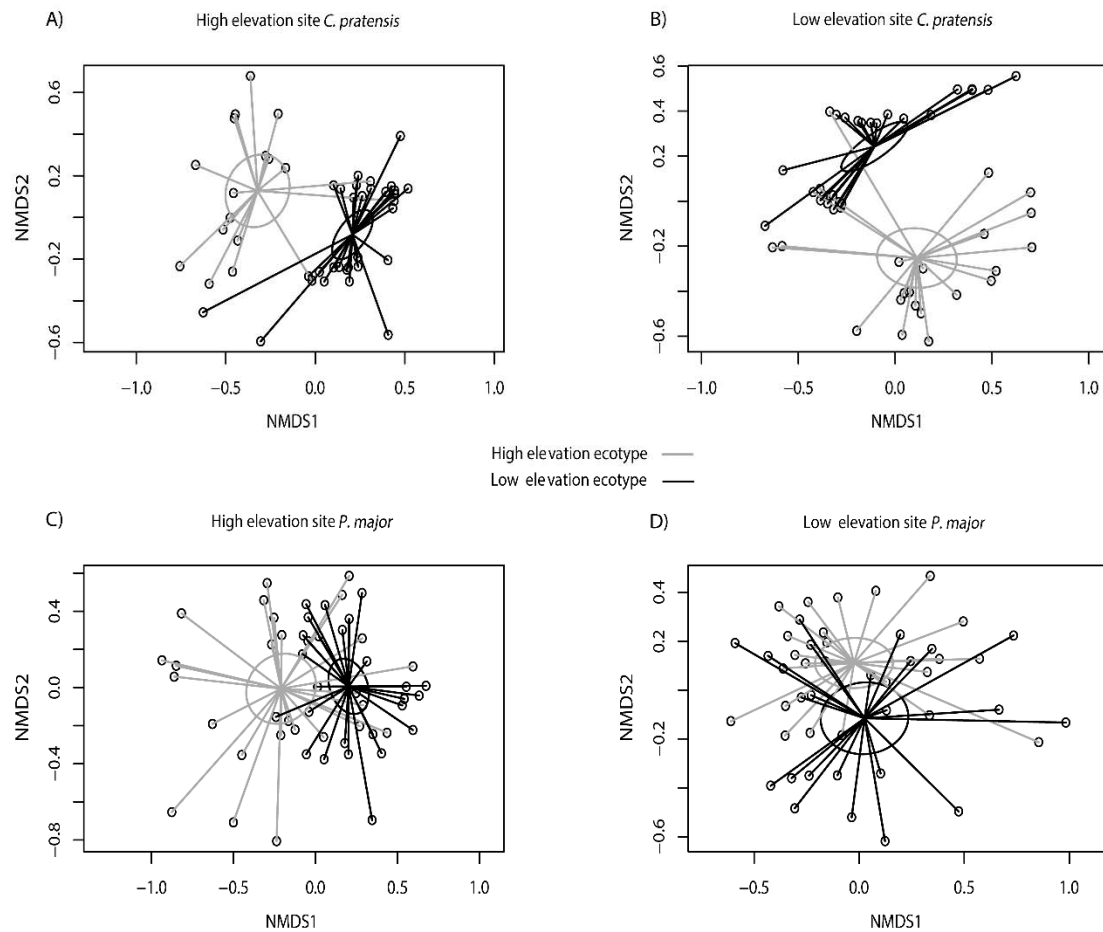

**Fig. 5.** Glucosinolates (GLS), *iridoid glycosides* (IGs) and caffeoyl phenylethanoid glycoside (CPG) ordinations. Representation of the non-multidimensional scaling (NMDS) indicating the GLS found in high and low *C. pratensis* ecotypes at high (A) and low (B) elevation sites and IGs and CPG found in *P. major* ecotypes at high (C) and low (D) elevation sites. The 95% confidence interval ellipses are represented based on the two elevation ecotypes (high elevation ecotype in grey and low elevation ecotype in black). Stress values: (A) and (B) = 0.12, (C) and (D) = 0.2, K = 2.
